# Supplementary material for: Childhood respiratory illness presentation and service utilisation in primary care: a six-year cohort study in Wellington, New Zealand, using natural language processing (NLP) software
Source: PubMed Central journal article supplement — BMJ Open. 2017 Aug 1;7(7):e017146. doi: 10.1136/bmjopen-2017-017146 (PMC5642764; doi:10.1136/bmjopen-2017-017146), 2017-08-01
Supplement: bmjopen-2017-017146.draft_revisions.pdf [file bmjopen-2017-017146.draft_revisions.pdf]

# BMJ Open

BMJ Open is committed to open peer review. As part of this commitment we make the peer review history of every article we publish publicly available.

When an article is published we post the peer reviewers' comments and the authors' responses online. We also post the versions of the paper that were used during peer review. These are the versions that the peer review comments apply to.

The versions of the paper that follow are the versions that were submitted during the peer review process. They are not the versions of record or the final published versions. They should not be cited or distributed as the published version of this manuscript.

BMJ Open is an open access journal and the full, final, typeset and author-corrected version of record of the manuscript is available on our site with no access controls, subscription charges or pay-per-view fees (<http://bmjopen.bmj.com>).

If you have any questions on BMJ Open's open peer review process please email [editorial.bmjopen@bmj.com](mailto:editorial.bmjopen@bmj.com)

# BMJ Open

## Childhood respiratory illness presentation and service utilisation in primary care: a six year cohort study using big data.

|                                 |                                                                                                                                                                                                                                                                                                                                                                                                                                        |
|---------------------------------|----------------------------------------------------------------------------------------------------------------------------------------------------------------------------------------------------------------------------------------------------------------------------------------------------------------------------------------------------------------------------------------------------------------------------------------|
| Journal:                        | <i>BMJ Open</i>                                                                                                                                                                                                                                                                                                                                                                                                                        |
| Manuscript ID                   | bmjopen-2017-017146                                                                                                                                                                                                                                                                                                                                                                                                                    |
| Article Type:                   | Research                                                                                                                                                                                                                                                                                                                                                                                                                               |
| Date Submitted by the Author:   | 04-Apr-2017                                                                                                                                                                                                                                                                                                                                                                                                                            |
| Complete List of Authors:       | Dowell, Anthony; University of Otago - Wellington , Primary Health Care and General Practice<br>Darlow, Ben; University of Otago, Primary Health Care and General Practice<br>MacRae, Jayden; Datacraft Analytics<br>Stubbe, Maria; University of Otago, Primary Health Care and General Practice<br>Turner, Nikki; University of Auckland, General Practice and Primary Health Care<br>McBain, Lynn; University of Otago, Wellington, |
| <b>Primary Subject Heading</b>: | General practice / Family practice                                                                                                                                                                                                                                                                                                                                                                                                     |
| Secondary Subject Heading:      | Health informatics, Paediatrics, Respiratory medicine                                                                                                                                                                                                                                                                                                                                                                                  |
| Keywords:                       | PRIMARY CARE, General Practice, Child health, Big Data, Respiratory illness                                                                                                                                                                                                                                                                                                                                                            |
|                                 |                                                                                                                                                                                                                                                                                                                                                                                                                                        |

SCHOLARONE™  
Manuscripts

only

# Childhood respiratory illness presentation and service utilisation in primary care: a six year cohort study using big data.

Anthony Dowell. MBChB. – corresponding author.  
Department of Primary Health Care and General Practice.  
University of Otago – Wellington.  
23 Mein St, Newtown, Wellington 6242. New Zealand.  
[Tony.dowell@otago.ac.nz](mailto:Tony.dowell@otago.ac.nz)  
+64 21 270 1617.

Ben Darlow. PhD  
Department of Primary Health Care and General Practice.  
University of Otago – Wellington. 23 Mein St, Newtown, Wellington 6242. New Zealand.

Jayden Macrae. MSc  
Patients First, Level 4, 50 Customhouse Quay, Wellington 6011, New Zealand.

Maria Stubbe. PhD.  
Department of Primary Health Care and General Practice.  
University of Otago – Wellington. 23 Mein St, Newtown, Wellington 6242. New Zealand.

Nikki Turner. MD.  
Department of General Practice and Primary Health Care. University of Auckland. Level 8, Petherick Towers. 38 Waring Taylor St. Wellington CBD. New Zealand.

Lynn McBain. MD.  
Department of Primary Health Care and General Practice.  
University of Otago – Wellington. 23 Mein St, Newtown, Wellington 6242. New Zealand.

Word count 2955

Key words

Primary Care, General Practice, Childhood respiratory illness, Natural language software programming, Big data.

## Abstract

### Objectives.

To identify childhood respiratory illness presentation rates and service utilisation in primary care, by interrogating free text and coded data from Electronic Medical Records.

### Design.

Retrospective cohort study. Data interrogation used a natural language processing software inference algorithm.

**Setting.** 36 primary care practices in New Zealand. Data analysed from January 2008 – December 2013.

### Participants

The records from 77,582 children enrolled in were reviewed over a six-year period to estimate the presentation of childhood respiratory illness and service utilisation. This cohort represents 268,919 person years of data and over 650,000 unique consultations.

**Main outcome measure.** Childhood respiratory illness presentation rate to Primary Care practice, with description of seasonal and yearly variation.

### Results.

Respiratory conditions constituted 46 per cent of all child-GP consultations with a stable year on year pattern of seasonal peaks. Upper Respiratory Tract Infection was the most common respiratory category accounting for 21.0% of all childhood consultations, followed by otitis media (12.2%), wheeze-related illness (9.7%), throat infection (7.4 %), and Lower Respiratory Tract Infection (4.4 %). Almost 70 per cent of children presented to their GP with at least one respiratory condition in their first year of life; this reduced to approximately 25 per cent for children aged 10 to 17.

### Conclusion.

This is the first study to assess the primary care incidence and service utilisation of childhood respiratory illness in a large primary care cohort by interrogating Electronic Medical Record free text. The study identified the very high primary care workload related to childhood respiratory illness, especially during the first two years of life. These data can enable more effective planning of health service delivery. The findings and methodology have relevance to many OECD countries, and the use of primary care 'big data' in this way can be applied to other health conditions.

**Strengths and limitations of this study**

- This study uses a novel and validated natural language processing software inference algorithm to identify childhood respiratory illness presentation rates and service utilisation using primary care Big Data.
- The presentation and burden of childhood respiratory diseases in primary care has not previously been estimated with such a high degree of accuracy.
- The algorithm was designed to maximise specificity, thereby generating a conservative estimate of the burden of childhood respiratory disease in primary care by keeping false positives to a minimum
- The methodology has relevance to many OECD countries, and the use of primary care 'big data' in this way can be applied to other health conditions.
- This study analysed normal hours primary care GP consultations. The exclusion of nurse-only and out-of-hours consultations may result in an underestimation of primary care respiratory presentation rates.

## Introduction

Childhood is a crucial period for development and well-being. A healthy start to life reduces adulthood morbidity and enhances participation in society.<sup>1-4</sup> Physical illness is an important risk factor for poor health outcomes.<sup>5</sup> Globally, primary care is utilised by all children,<sup>6</sup> but there is currently little knowledge of detailed morbidity and utilisation patterns in community settings.

Respiratory illness contributes substantially to childhood morbidity yet few data exist describing the burden of respiratory illness in primary care. Children under five present up to six times a year with acute respiratory infections<sup>7</sup> and high prevalence rates are noted for asthma<sup>8</sup> and otitis media.<sup>9</sup> Such data are, however, mainly reliant on survey responses and parental report. These reports also lack precision regarding individual respiratory conditions, symptom severity, longitudinal patterns and variance related to age and seasonality. These data are needed to effectively plan primary health care service delivery. More detailed hospitalisation data are available<sup>10</sup>; however, these represent an unknown proportion of all cases and are based on diagnostic coding of uncertain accuracy.

International data suggest that respiratory conditions constitute 20 to 25% of all general practitioner (GP) consultations, with higher rates in those under 25 years.<sup>11,12</sup> These data are based on GP self-report, and accuracy may be limited by the competing demands of reporting, meeting patient needs and practice management tasks. Wide variance has been reported in how GPs describe the reason for encounter.<sup>12</sup>

Improved understanding of primary care childhood respiratory illness presentation could enable more systematic approaches to care and resource allocation, and a context for exploring important social and ethnic variations in hospitalisation rates.<sup>10,13</sup> In OECD countries, conditions such as bronchiolitis, asthma, upper respiratory tract infections, and pneumonia make up over 40 % of Ambulatory Sensitive Hospitalisation (ASH); admissions considered preventable through interventions delivered outside of hospitals, predominantly within primary care.<sup>5,10,14,15</sup>

More accurate assessment of illness presentation and service utilisation could be obtained by analysing consultation notes within electronic medical records (EMR) common in OECD primary care settings. While there has been some exploration of the potential for 'big data' assessment of general practice workload,<sup>16</sup> these data have not previously been used to analyse childhood respiratory service utilisation due to difficulties with extracting and analysing both structured and unstructured data available (primarily clinical consultation notes). The development of novel software has enabled the exploration of New Zealand EMR data.<sup>17,18</sup>

This study aimed to interrogate data from EMR to identify primary care presentation and service utilisation related to common childhood respiratory conditions.

## Methods

### Design

A natural language processing software inference algorithm was developed to interrogate quantitative and qualitative cross-sectional and retrospective cohort data from EMR.<sup>17,18</sup>

## Setting and participants

Figure 1 illustrates the creation and analysis of the dataset. In New Zealand there is universal enrolment with a primary care practice. All 60 practices within the networks of two primary health organisations (PHOs) in the Wellington region of New Zealand were invited to participate and 36 consented. The study area contains mixed city, urban and rural settings and the cohort consisted of the 77,582 children (75% of the two PHOs' child population; N=103,333) under 18 years of age enrolled in these 36 primary care practices between 1 January 2008 until 31 December 2013. This cohort represented 268,919 person years; children both joined and left this cohort during the six-year study period (e.g. births, deaths, turning 18 years, or moving into or out of a consenting practice).

Data were collected directly from EMR using software which automates the extraction, and secure transmission of large data sets. The dataset comprised records from consultations generated during both standard office hours and out-of-hours practice. Data were extracted from the EMR for all child-GP consultations at consenting practices during the study period (n= 687,136). Each consultation record was identified using an individual's National Health Index (NHI) number. The NHI is a unique identifier assigned to every person who uses health services in New Zealand and enabled records to be matched between datasets. Consultations for which there were poor quality data (2439 consults from 256 children) were excluded. Out-of-hours consultations (n=34,584) were not analysed due to differing participation in out-of-hours services by the practices. All data were analysed within the PHO which has rigorous protocols in place to ensure patient confidentiality. No identifiable data were ever accessed by the research team.

## Process

Each of the 650,123 clinical consultation notes was interrogated by a software inference algorithm and hierarchical classification system described previously.<sup>18</sup> The algorithm classified consultation records using: clinical information recorded by GPs and practice nurses, any recorded Read code diagnostic classifications, and prescribing information. The first level of the hierarchy divided all consultations into either 'respiratory' or 'not respiratory'. The 'not respiratory' category included consultations for presentations such as injury or gastroenteritis, and consultations in which the respiratory system was examined and screened, but no signs, symptoms, or diagnoses were recorded. These screening consultations were excluded so that the burden of respiratory illness estimate was not inflated by consultations which did not result from a respiratory illness.

The second level of the hierarchy sub-classified consultations into one or more specific respiratory categories. These categories were determined by a group of clinical experts; consideration was given to the degree to which conditions could be mapped to high prevalence (that which is common) and/or responsible for significant morbidity and hospitalisation (that which is important). The six categories were i) upper respiratory tract infections (URTI); ii) lower respiratory tract infections (LRTI); iii) wheeze-related illnesses; iv) throat infections; v) otitis media; and vi) other respiratory conditions. The conditions included within each diagnostic category are presented in Appendix 1.

The algorithm was trained, tested, and validated using three independent gold standard data sets of 1200 consultation records which had been independently classified by two general practice clinical experts (AD and LM). The algorithm was designed to replicate the judgements made by these clinical experts. Development aimed to optimise specificity while maximising sensitivity to minimise the

1  
2  
3 occurrence of false positives. The algorithm's sensitivity, specificity, positive and negative predictive  
4 values, and F-measure for each of the diagnostic categories against a gold standard validation set of  
5 1200 consultation records are presented in Appendix 2.  
6

## 7 8 **Analysis**

9 The demographic characteristics of age, gender, ethnicity (NZ indigenous Māori, Pacific, other), and  
10 New Zealand Deprivation Index (a measure of socioeconomic deprivation<sup>19</sup>) of the cohort (n=77,326)  
11 were compared with those of all children enrolled within the two PHOs (N=103,333) and the  
12 New Zealand population using national census data.  
13

14 The proportion of primary care consultations for children aged 18 years and under which were  
15 related to the six specific respiratory conditions outlined above was obtained from the dataset using  
16 the algorithm. The utilisation of services for these six conditions was analysed by demographic  
17 characteristics. Consultation rates are expressed per 1000 child years observed due to the differing  
18 length of time individuals might be participants in the cohort. Patients were observed for the period  
19 in which they were enrolled in a participating practice; this was calculated from the date of a child's  
20 first visit to a practice until they were removed from the enrolment register. Both deprivation and  
21 ethnicity status were taken as the last ethnicity and deprivation recorded from the GP records.  
22 Consultation rates were adjusted for sensitivity and specificity of the algorithm (see Appendix 2) and  
23 a direct standardization method was applied to level 2 ethnicity and socio-economic deprivation  
24 quintiles against NZ Census 2013 data. Estimates of true rates were made using final test sensitivity  
25 and specificity results for each classification category using the method described by Rogan and  
26 Gladen.<sup>20</sup> All Data aggregation, transformation, cleaning and storage was done in Microsoft SQL  
27 Server, and statistical analysis was undertaken in R using packages including boot,  
28 epiR, combinat, stats, tm, RWeka, slam, SnowballC and caret.<sup>21</sup>  
29  
30  
31

## 32 33 **Results**

34 The demographic characteristics of the study cohort closely matched those of the enrolled  
35 population (Appendix 3). The age distribution of the study cohort also closely matched the national  
36 comparison data. Compared with national census data the study cohort had a greater proportion of  
37 children from the least deprived quintile grouping (32% vs 25%) and a lower proportion of Māori  
38 (17% vs 22%).  
39  
40

41 From the 650,123 consultations reviewed the true rate of presentation for a respiratory condition  
42 was calculated to be 45.4 per cent of all consultations for children under 18 years of age (Figure 1).  
43 URTI was the most common respiratory category represented in 21.0% of all consultations, followed  
44 by otitis media (12.2%), wheeze-related illness (9.7%), throat infection (7.4%), and LRTI (4.4%).  
45 Other respiratory classifications accounted for just 1.5% of all consultations. One respiratory  
46 condition was classified in 27.6% of all consultations, two in 7.0%, three in 0.8%, and greater than  
47 three in 0.1%. The rates of child respiratory condition consultation were 1,101 per 1,000 person  
48 years observed for all respiratory conditions, 509 per 1000 for URTI, 107 per 1000 for LRTI, 235 per  
49 1000 for Wheeze Illness, 180 per 1000 for Throat Infections, 296 per 1000 for Otitis Media and 36  
50 per 1000 for Other Respiratory conditions. The incidence of both respiratory and non-respiratory  
51 consultations remained stable throughout the study period with a consistent pattern of seasonal  
52 peaks and troughs (Fig 2). The respiratory consultation rate was highest in the Southern Hemisphere  
53 winter month of August, and lowest in January (Figure 3). Non-respiratory consultations followed a  
54 similar pattern but with shallower peaks and troughs. Respiratory conditions explained 64.4% of the  
55  
56  
57  
58  
59  
60



1  
2  
3 annual seasonal variation in child consultation rates. All respiratory conditions which were sub-  
4 classified followed a similar pattern of peaks in August and troughs in January except for 'other'  
5 respiratory conditions which were highest in December and lowest in April (Figure 4). Figures 4 and 5  
6 present the annual variation in respiratory condition presentation for each classification category.  
7

8  
9 Respiratory consultations occurred throughout childhood, but at much greater frequency during the  
10 first two years of life. (Figure 6) During the first year of life 73.5 % of children presented to their GP  
11 with at least one respiratory condition. Following the second year of life, the presentation of all  
12 respiratory conditions decreased with increasing age. Of children aged 10 to 17 years, 22.5 %  
13 presented with at least one respiratory condition (Figure 6).  
14  
15  
16  
17  
18  
19  
20  
21  
22  
23  
24  
25  
26  
27  
28  
29  
30  
31  
32  
33  
34  
35  
36  
37  
38  
39  
40  
41  
42  
43  
44  
45  
46  
47  
48  
49  
50  
51  
52  
53  
54  
55  
56  
57  
58  
59  
60

Fig 2 : Respiratory and non-respiratory consultations per quarter per 1000 enrolled children January 2008 to December 2013.

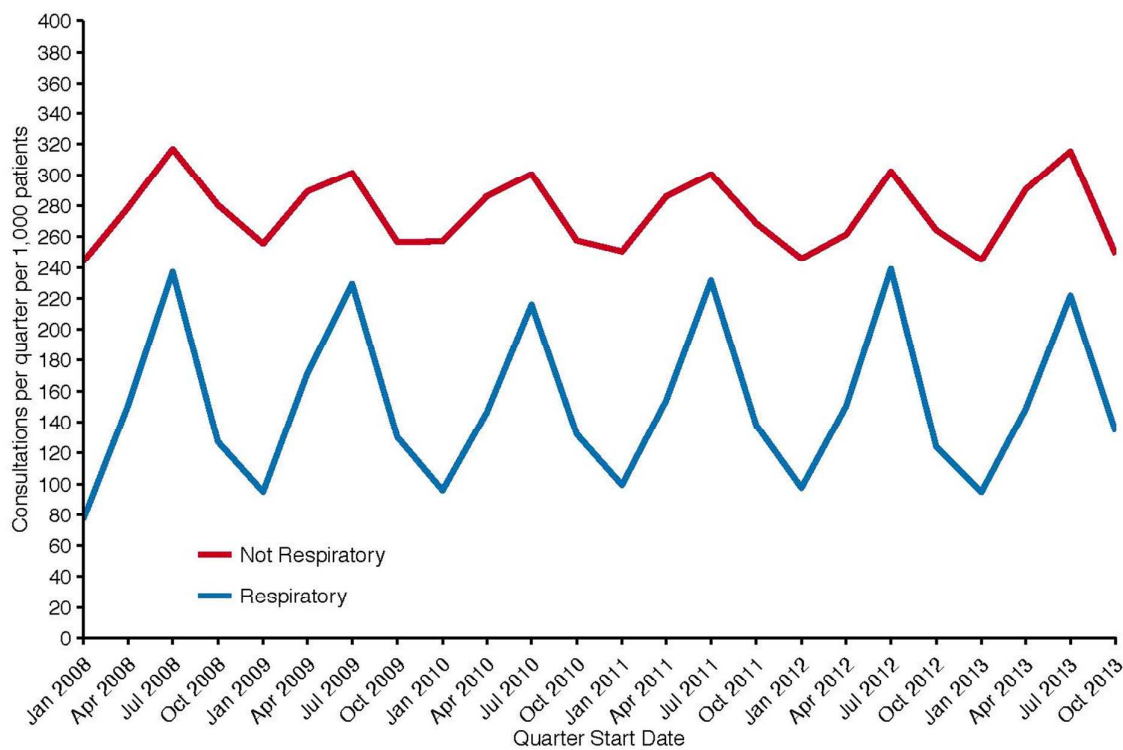

Figure 3: Mean respiratory and non-respiratory consultations per month per 1000 enrolled children. January 2008 to December 2013 demonstrating seasonal variation.

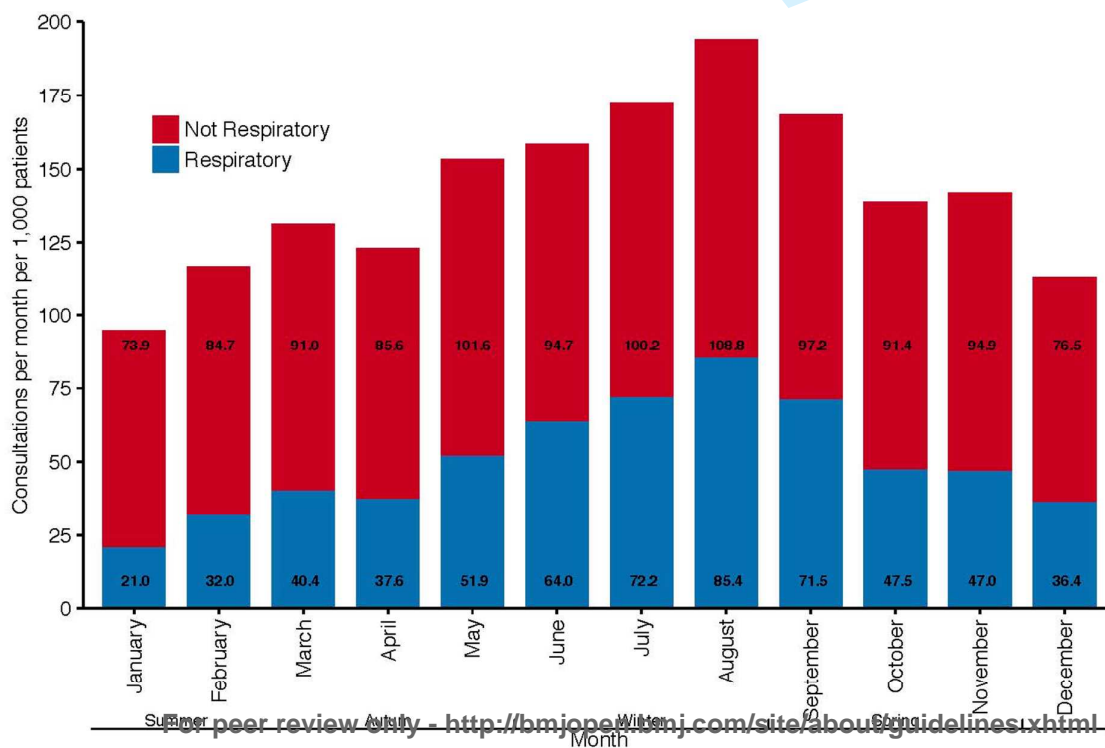

Figure 4: Yearly variation of consultations per month per 1000 enrolled children for each respiratory illness category - January 2008 to December 2013.

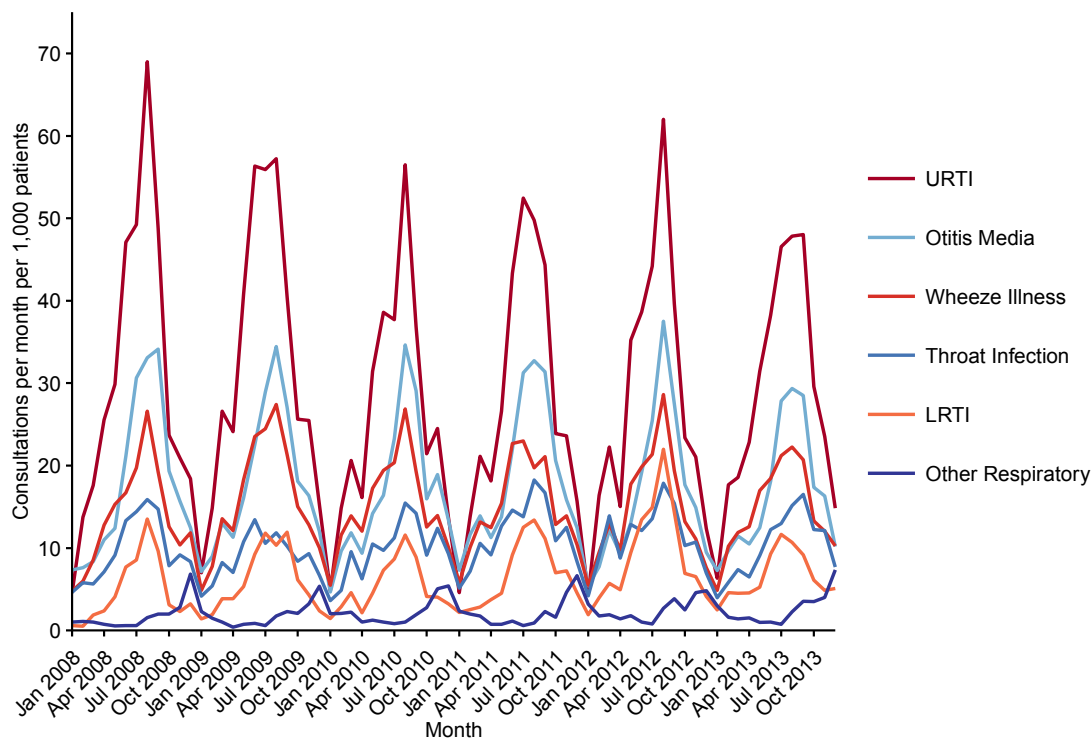

Figure 5: Mean consultations per month per 1000 enrolled children for each respiratory illness category - January 2008 to December 2013

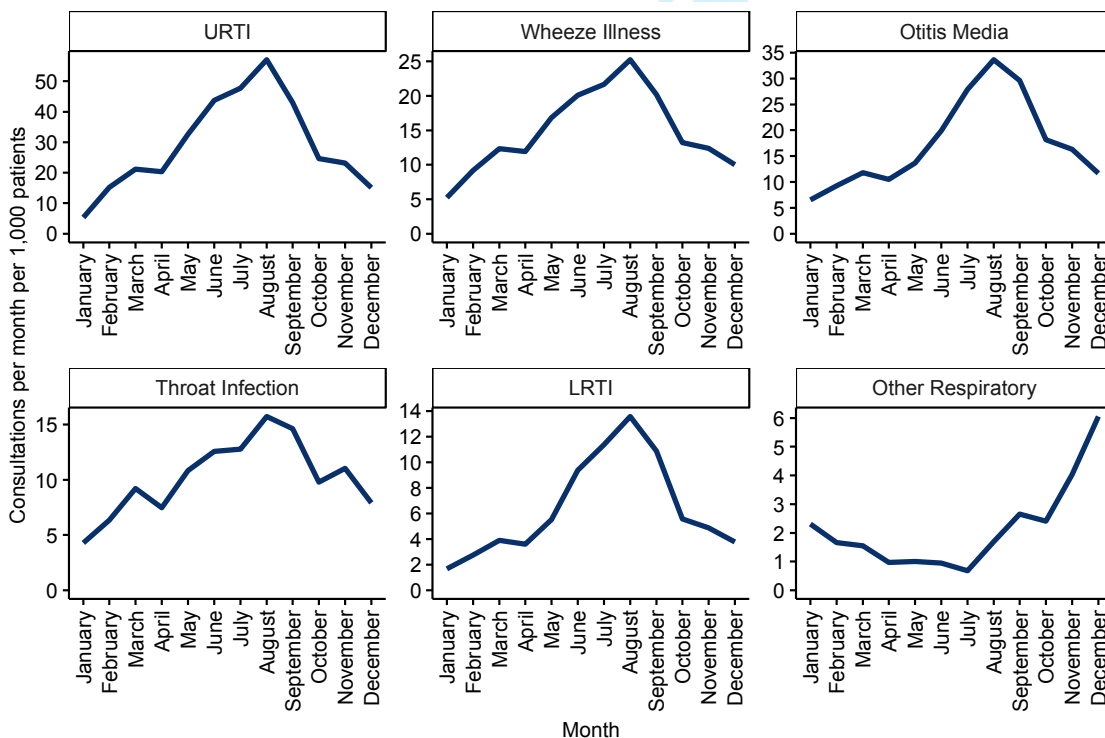

Figure 6: Respiratory consultation frequency by selected age cohort.

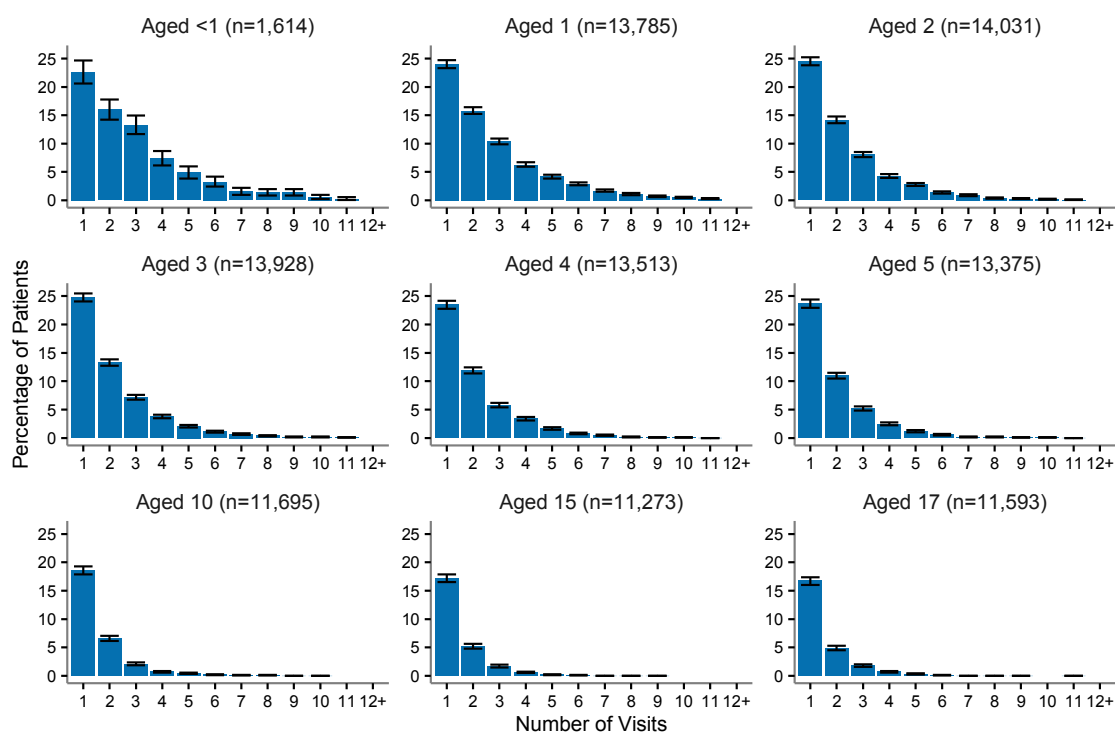

Figure 6: Each facet includes children who were enrolled within that age band for a twelve month period (e.g. from the day they turned one until the day before they turned two). The cohort of children under one is small because many children do not enrol until they are over three months old and may therefore only be enrolled for nine months before turning one.

## Discussion

This is the first study to assess the primary care incidence and service utilisation of childhood respiratory illness in such a large cohort observing over 250,000 person years and more than 650,000 unique consultations. Using a novel and validated method of interrogating EMR free text, this study found that respiratory conditions constituted 45.4 per cent of all child-GP consultations. This quantifies the very high volume of childhood respiratory consultations and workload in general practice, especially during the first two years of life. These data can enable more effective planning of primary care service delivery and indicate areas in which to focus preventive programmes. The study also highlights the high presentation rates to primary care of those respiratory conditions which frequently present for hospital admission.

## Comparison with other studies

The presentation rate of respiratory illness and pattern of seasonal peaks was remarkably stable across the six years included in this data set and was unchanged by events such as the H1N1 influenza pandemic of 2009. Consistent with findings from an Australian survey,<sup>7,22</sup> the presentation of nearly all respiratory consultations more than doubled during the winter months. Respiratory consultations classified as 'other' had a different pattern with a peak in spring, consistent with seasonal allergies being the primary contributor to this classification group. The high presentation

1  
2  
3 rates of wheeze-related illness highlights the importance of these conditions in primary care  
4 management, and aligns with the high community burden of wheeze identified from other cohort  
5 studies.<sup>8,23</sup> The prevalence of otitis media is consistent with other studies.<sup>24</sup>  
6

7  
8 Childhood respiratory conditions feature highly as a cause of hospital admissions thought to be  
9 amenable to preventive activity in primary care. These data suggests only small numbers of children  
10 are hospitalised compared to the high volume of respiratory conditions managed within general  
11 practice.<sup>10,25</sup> It is possible that paediatric hospitalisations thus represent appropriate care for  
12 children with severe respiratory illness, or significant socioeconomic difficulty rather than reflecting  
13 unmet need within primary care.  
14

15  
16 These data also provide information about consulting patterns across across the childhood life  
17 course, highlighting the frequency of consultation in the early years and in particular during the first  
18 two years of life. While high consultation frequency in the earlier years has been recognised  
19 previously, data have usually been grouped within a birth to five years age band,<sup>26</sup> or focused on a  
20 single year of life.<sup>27</sup> This study highlights the degree of primary care contact children have in their  
21 first two years of life. Strategic management of clinical contact during this time may improve care  
22 delivery and enable a balance between preventive and acute care activity.  
23  
24

## 25 **Strengths and limitations of study**

26  
27 This study examined a very large data set of child-GP consultations including clinical consultation  
28 notes, diagnostic codes and prescribing information by way of a software inference algorithm which  
29 performed with similar accuracy to clinical experts.<sup>17</sup> The algorithm was designed to maximise  
30 specificity, thereby generating a conservative estimate of the burden of childhood respiratory  
31 disease in primary care by keeping false positives to a minimum. The presentation and burden of  
32 childhood respiratory diseases in primary care has not previously been estimated with such a high  
33 degree of accuracy.  
34  
35

36  
37 Computer algorithms using natural language processing have previously been found to be  
38 considerably more accurate than relying on diagnostic codes to make respiratory diagnoses.<sup>28</sup>  
39

40  
41 Data representing 75 per cent of the child population enrolled within two large primary health  
42 organisations, were analysed. The study data set included over 650,000 consultation records  
43 (representing over 260,000 person years of data) and the age, ethnic, and socioeconomic  
44 characteristics of children enrolled within participating practices were almost identical to those of  
45 children enrolled in practices which declined, and to the broader New Zealand population.  
46

47  
48 This study analysed normal hours primary care GP consultations. The exclusion of nurse-only and  
49 out-of-hours consultations may result in an underestimation of primary care respiratory  
50 presentation rates. Nurse-only consultations were excluded because only a small proportion of  
51 nursing records relate to direct clinical consultations and it was not possible for the algorithm to  
52 distinguish these from non-clinical records such as telephone calls.<sup>17</sup> The data set excluded out-of-  
53 hours consultations because out-of-hours care is also provided elsewhere to children from  
54 consenting practices, consequently PHO out-of-hours data were incomplete.  
55

56  
57 Although validation of the software algorithm against the gold standard of two expert clinicians'  
58 opinion indicated that it had excellent accuracy, particularly with respect to classification of  
59  
60

1  
2  
3 consultations as respiratory or non-respiratory, this methodology can only provide an estimation of  
4 the presentation of these respiratory conditions and resultant service utilisation. It would be  
5 impractical to manually check the several hundred thousand consultation records included in the full  
6 data set. Notwithstanding this, it is debateable whether manual record review would generate a  
7 more accurate estimation.<sup>29,30</sup>  
8  
9

10 The study used the treating GP's stated diagnosis, or experts' assessment of the presumed diagnosis  
11 based upon clinical information and prescriptions recorded, as the gold standard. Consequently, this  
12 gold standard included potentially erroneous diagnoses made by the treating GPs,<sup>31,32</sup> and is limited  
13 by the information which the GPs determined was pertinent to record. However, the goal of this  
14 study was to estimate the burden of illness within primary care as defined by the care received. The  
15 GP perception of the conditions being managed is of prime importance in determining health service  
16 utilisation and hence this limitation does not affect the algorithm's ability to provide important and  
17 useful data.  
18  
19

20 The need to have conditions with sufficient prevalence to train the algorithm meant that a number  
21 of important but less prevalent conditions (e.g. croup, pertussis, and pneumonia) were not able to  
22 be individually classified. As a result, the study cannot give estimations of the burden of some  
23 diseases, which although relatively rare have considerable morbidity. The algorithm was not  
24 designed to differentiate between types of wheeze-related illness given the variation and debate  
25 among clinicians regarding the classification of wheeze presentations for younger children.<sup>33</sup>  
26  
27  
28

## 29 **Conclusions and policy implications**

30 These data have demonstrated a clear and consistent pattern in general practice utilisation for  
31 children with respiratory illness. Results of this type can assist with general practice workforce  
32 planning, and inform debate about current presentation and triage models seen in primary care. The  
33 study also highlighted the burden of respiratory disease carried by the youngest members of society  
34 and reinforces calls to focus prevention and health promotion campaigns on early stages of the  
35 maternal and child health continuum.  
36  
37

38 The methodology used can be applied to provide similar estimates of respiratory and other  
39 conditions and workload across an entire population at all ages. The use of 'big data' in this way also  
40 provides a tool for health service planning in primary care which would have increasing application  
41 across a wide range of countries.  
42  
43  
44  
45  
46  
47  
48

## 49 **Footnotes**

## 52 **Acknowledgements**

53 The authors gratefully acknowledge the primary care practices which consented to their  
54 consultation records being included in the study dataset, and the primary health organisations which  
55 permitted use of proprietary software and resources.  
56  
57  
58  
59  
60

## Author contributions

AD, JM, MS, LM, and NT conceived of the study. All authors contributed to the development of the overall study methodology. AD, LM and NT provided clinical input into the algorithm design. JM designed and built the natural language processing tools. JM programmed and trained the algorithm. AD and LM classified the consultation records in the gold standard sets. BD and AD were the principal writers of the manuscript. All authors reviewed and revised the manuscript and approved its final version.

All authors had full access to all of the data (including statistical reports and tables) in the study and can take responsibility for the integrity of the data and the accuracy of the data analysis.

## Competing interests

All authors have completed the Unified Competing Interest form at [www.icmje.org/coi\\_disclosure.pdf](http://www.icmje.org/coi_disclosure.pdf) (available on request from the corresponding author) and declare support from New Zealand Lotteries Health Research for the submitted work. LM is a director of Compass Health Wellington Trust that might have an interest in the submitted work, no other relationships or activities could appear to have influenced the submitted work

## Licence

The Corresponding Author has the right to grant on behalf of all authors and does grant on behalf of all authors, a worldwide licence (<http://www.bmj.com/sites/default/files/BMJ%20Author%20Licence%20March%202013.doc>) to the Publishers and its licensees in perpetuity, in all forms, formats and media (whether known now or created in the future)

## Funding statement

This work was supported by a New Zealand Lotteries Health Research Grant. The funding body had no role in the collection or analysis of data or the preparation of this manuscript.

## Provenance and peer review

Not commissioned; externally peer reviewed.

## Data sharing statement

No additional data are available.

## Open Access

This is an Open Access article distributed in accordance with the Creative Commons Attribution Non Commercial (CC BY-NC 4.0) license, which permits others to distribute, remix, adapt, build upon this work non-commercially, and license their derivative works on different terms, provided the original

1  
2  
3 work is properly cited and the use is non-commercial. See: <http://creativecommons.org/licenses/by-nc/4.0/>  
4  
5  
6

### 7 **Ethical approval**

8  
9 This study was approved by the University of Otago Ethics Committee (H13/044)  
10  
11  
12  
13  
14  
15  
16  
17  
18  
19  
20  
21  
22  
23  
24  
25  
26  
27  
28  
29  
30  
31  
32  
33  
34  
35  
36  
37  
38  
39  
40  
41  
42  
43  
44  
45  
46  
47  
48  
49  
50  
51  
52  
53  
54  
55  
56  
57  
58  
59  
60



1  
2  
3  
4  
5  
6  
7  
8  
9  
10  
11  
12  
13  
14  
15  
16  
17  
18  
19  
20  
21  
22  
23  
24  
25  
26  
27  
28  
29  
30  
31  
32  
33  
34  
35  
36  
37  
38  
39  
40  
41  
42  
43  
44  
45  
46  
47  
48  
49  
50  
51  
52  
53  
54  
55  
56  
57  
58  
59  
60

Figure 1. Selection of child-GP consultation notes and results from analysis.

More than one respiratory condition can be classified in each consultation.

GP = general practitioner; URTI = upper respiratory tract infection; LRTI = lower respiratory tract infection; Wheeze-ill = wheeze-related illness

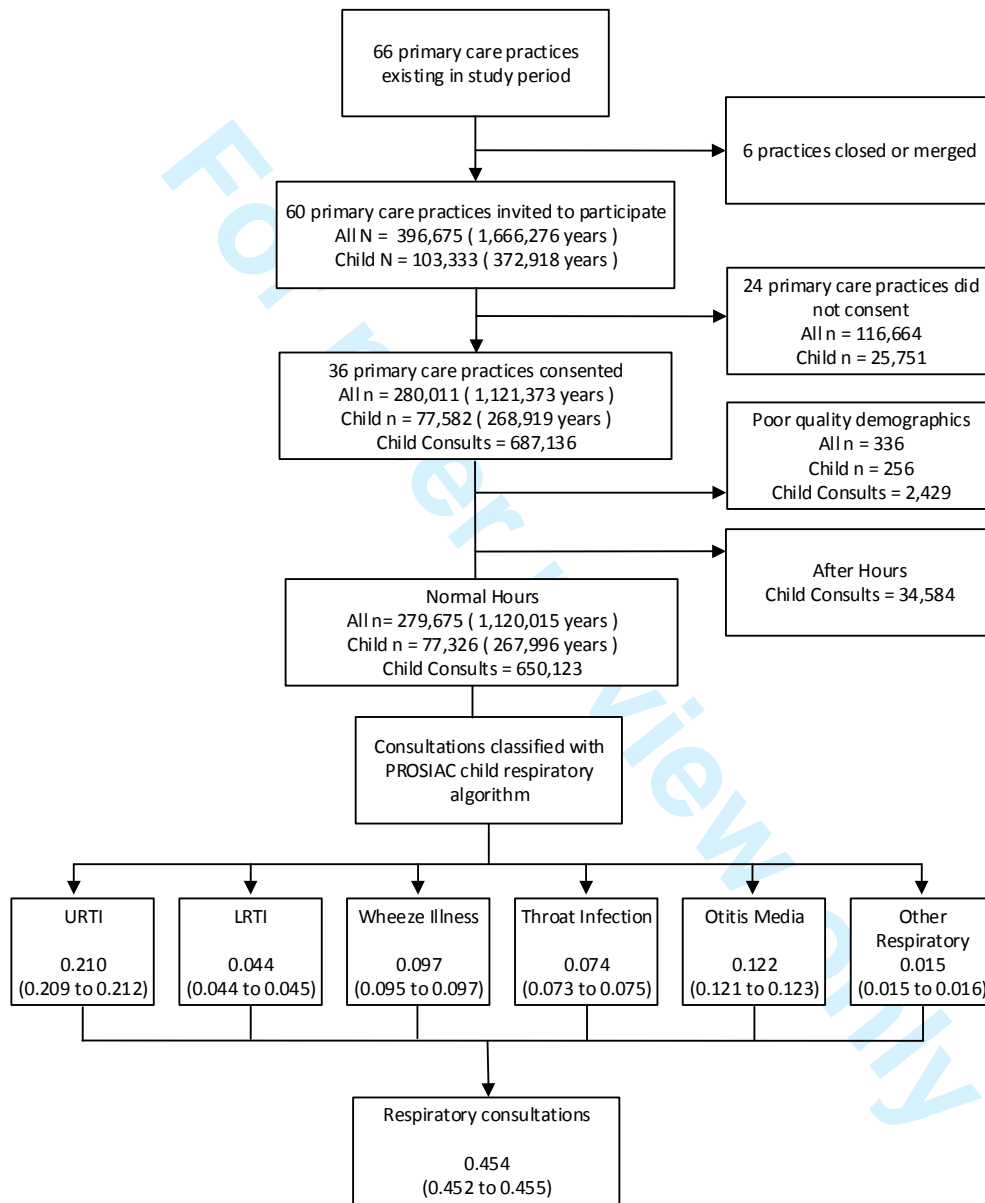

## Appendix 1

Respiratory classification categories and the conditions included in each

| Classification category            | Respiratory conditions included within category*                                                                                                                                                                                                                                                                                                                                                                                                                                                                                                                                                    |
|------------------------------------|-----------------------------------------------------------------------------------------------------------------------------------------------------------------------------------------------------------------------------------------------------------------------------------------------------------------------------------------------------------------------------------------------------------------------------------------------------------------------------------------------------------------------------------------------------------------------------------------------------|
| Upper respiratory tract infections | <ul style="list-style-type: none"> <li>• Cold</li> <li>• Croup</li> <li>• Influenza-like illness</li> <li>• Viral influenza in the absence of associated signs or symptoms indicative of lower respiratory tract infection</li> <li>• Scarlet fever</li> <li>• Tracheitis</li> <li>• Cough in the absence of associated signs or symptoms indicative of asthma or lower respiratory tract infection</li> </ul>                                                                                                                                                                                      |
| Lower respiratory tract infections | <ul style="list-style-type: none"> <li>• Bronchitis</li> <li>• Bronchopneumonia</li> <li>• Chest infection</li> <li>• Chronic lung disease</li> <li>• Cystic fibrosis</li> <li>• Lung abscess/bronchiectasis</li> <li>• Pertussis</li> <li>• Pleurisy</li> <li>• Pneumonia</li> <li>• Tuberculosis</li> <li>• Whooping cough</li> </ul>                                                                                                                                                                                                                                                             |
| Wheeze-related illness             | <ul style="list-style-type: none"> <li>• Bronchiolitis</li> <li>• Virus-induced transient wheeze</li> <li>• Persistent wheeze (nonatopic or atopic)</li> <li>• Asthma</li> </ul>                                                                                                                                                                                                                                                                                                                                                                                                                    |
| Throat infections                  | <ul style="list-style-type: none"> <li>• Infectious mononucleosis</li> <li>• Laryngitis</li> <li>• Pharyngitis</li> <li>• Pharyngotonsillitis</li> <li>• Tonsillitis</li> </ul>                                                                                                                                                                                                                                                                                                                                                                                                                     |
| Otitis media                       | <ul style="list-style-type: none"> <li>• Acute otitis media</li> <li>• Chronic suppurative otitis media</li> <li>• Otitis media with effusion</li> <li>• Glue ear</li> </ul>                                                                                                                                                                                                                                                                                                                                                                                                                        |
| Other respiratory                  | <ul style="list-style-type: none"> <li>• Conditions with very low prevalence ) for which there are not individual categories <ul style="list-style-type: none"> <li>○ Allergic rhinitis</li> <li>○ Hay fever</li> <li>○ Rhinitis</li> <li>○ Sinusitis</li> </ul> </li> <li>• Consultations in which respiratory symptoms are present but there is insufficient GP entered data to enable classification</li> <li>• Consultations in which respiratory symptoms are present with sufficient GP entered data to enable classification but the algorithm fails to classify the consultation</li> </ul> |

\*These classifications are based purely on the information within the electronic health record including consultation notes, medications prescribed and diagnostic Read Codes created on the day of the consultation. It does not include subsequent laboratory tests

## Appendix 2

Automated software inference algorithm measures of performance in the validation set (Set 3)

| Diagnostic category | Incidence (95% CI)  | Sensitivity (95% CI) | Specificity (95% CI) | Positive predictive value (95% CI) | Negative predictive value (95% CI) | F-measure (95% CI)  |
|---------------------|---------------------|----------------------|----------------------|------------------------------------|------------------------------------|---------------------|
| Respiratory         | 0.46 (0.42 to 0.50) | 0.72 (0.67 to 0.78)  | 0.95 (0.93 to 0.98)  | 0.93 (0.89 to 0.97)                | 0.80 (0.76 to 0.84)                | 0.81 (0.77 to 0.85) |
| LRTI                | 0.04 (0.02 to 0.06) | 0.61 (0.39 to 0.83)  | 0.99 (0.98 to 1.00)  | 0.76 (0.55 to 0.95)                | 0.98 (0.97 to 0.99)                | 0.67 (0.47 to 0.85) |
| URTI                | 0.21 (0.18 to 0.25) | 0.54 (0.45 to 0.64)  | 0.98 (0.96 to 0.99)  | 0.86 (0.78 to 0.94)                | 0.89 (0.86 to 0.92)                | 0.66 (0.57 to 0.74) |
| Wheeze ill          | 0.09 (0.06 to 0.12) | 0.96 (0.90 to 1.00)  | 0.96 (0.94 to 0.98)  | 0.70 (0.59 to 0.82)                | 1.00 (0.99 to 1.00)                | 0.81 (0.73 to 0.89) |
| Throat infections   | 0.10 (0.08 to 0.13) | 0.50 (0.37 to 0.64)  | 0.99 (0.99 to 1.00)  | 0.91 (0.79 to 1.00)                | 0.95 (0.92 to 0.96)                | 0.64 (0.51 to 0.76) |
| Otitis media        | 0.12 (0.10 to 0.15) | 0.58 (0.45 to 0.71)  | 0.99 (0.98 to 1.00)  | 0.90 (0.81 to 1.00)                | 0.94 (0.92 to 0.96)                | 0.71 (0.59 to 0.81) |
| Other               | 0.02 (0.01 to 0.04) | 0.66 (0.38 to 0.92)  | 0.99 (0.98 to 1.00)  | 0.68 (0.40 to 1.00)                | 0.99 (0.98 to 1.00)                | 0.66 (0.42 to 0.87) |

LRTI = lower respiratory tract infections; URTI = upper respiratory tract infections; Wheeze ill = wheeze-related illness; other = other respiratory condition.

Appendix 3: Demographic characteristics of children in the study cohort at the end of the study compared with enrolled population and national census data.

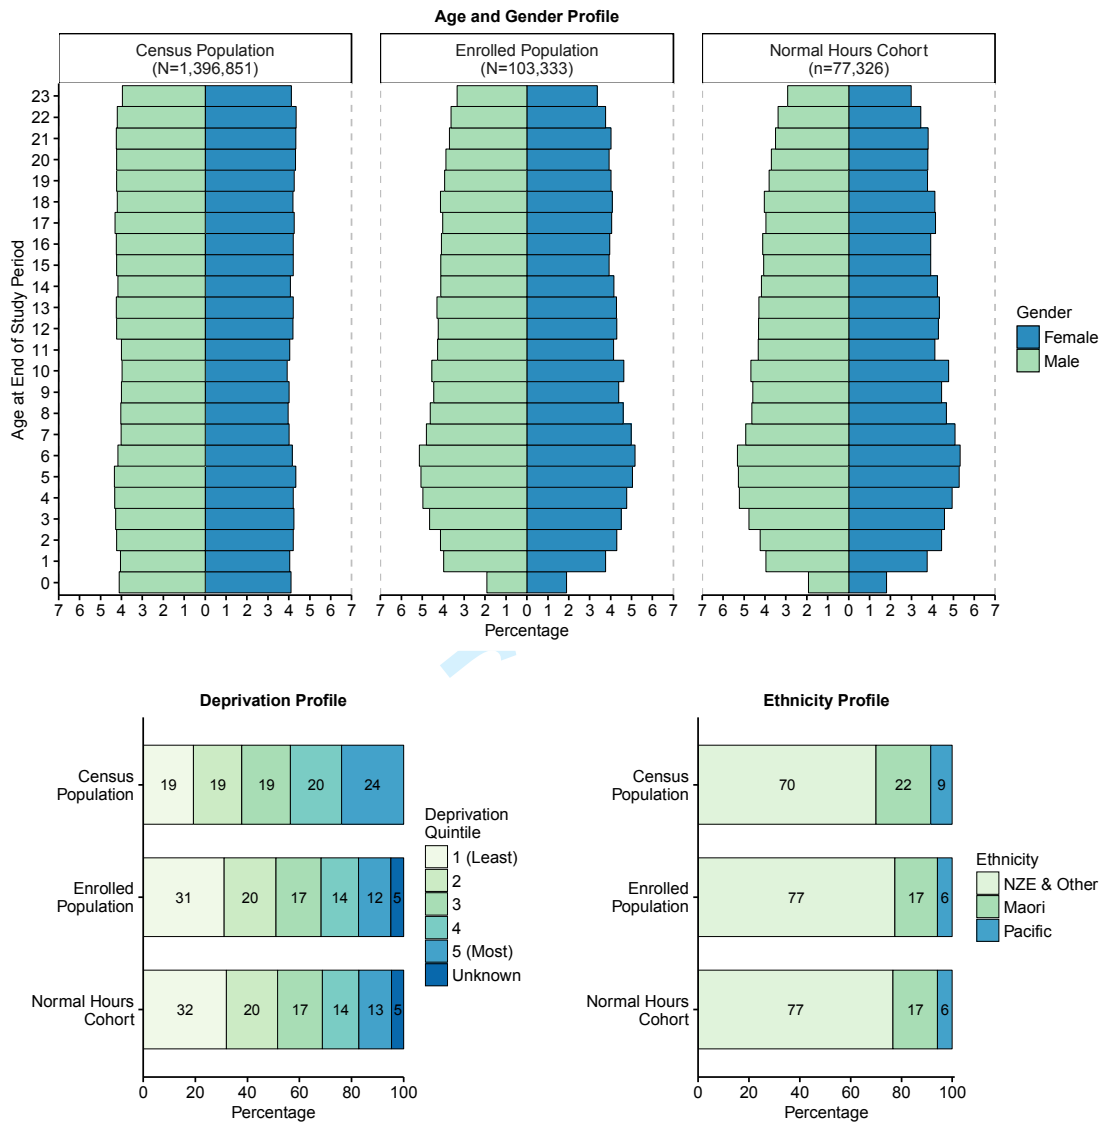

Note that the age range extends to 22 because people who were 17 at the start of the study period were 23 at the end of the study. Data stopped being collected from these participants when they turn 18.

The cohort appears to have a low proportion of children under one year of age because the cohort demographic data represents the last day of the study, so many children who entered the cohort under one year of age had moved into a higher age band.

Deprivation quintile is unknown for 0.05 per cent of the census population. This is not shown on the graph.

## References

1. Hertzman C, Siddiqi A, Hertzman E, et al. Tackling inequality: get them while they're young. *BMJ* 2010; **340**(7742): 346-8.
2. Lynch JW, Kaplan GA, Cohen RD, et al. Childhood and adult socioeconomic status as predictors of mortality in Finland. *The Lancet* 1994; **343**(8896): 524-7.
3. Marmot MG, Allen JL, Goldblatt P, et al. Fair society, healthy lives: Strategic review of health inequalities in England post-2010. 2010.
4. Walker SP, Wachs TD, Grantham-McGregor S, et al. Inequality in early childhood: risk and protective factors for early child development. *The Lancet* 2011; **378**(9799): 1325-38.
5. The Green Paper for Vulnerable Children. Every child thrives, belongs, achieves. Wellington, NZ.: New Zealand Government, 2011.
6. Ministry of Health. New Zealand Health Survey: Annual update of key findings 2012/13. Wellington, NZ: Ministry of Health, 2013.
7. Chen Y, Kirk M. Incidence of acute respiratory infections in Australia. *Epidemiology and infection* 2014; **142**(07): 1355-61.
8. Asher MI, Montefort S, Björkstén B, et al. Worldwide time trends in the prevalence of symptoms of asthma, allergic rhinoconjunctivitis, and eczema in childhood: ISAAC Phases One and Three repeat multicountry cross-sectional surveys. *The Lancet* 2006; **368**(9537): 733-43.
9. Gribben B, Salkeld LJ, Hoare S, Jones HF. The incidence of acute otitis media in New Zealand children under five years of age in the primary care setting. *J Prim Health Care* 2012; **4**(3): 205-12.
10. Craig E, Anderson P, Jackson G, Jackson C. Measuring potentially avoidable and ambulatory care sensitive hospitalisations in New Zealand children using a newly developed tool. *Journal of the New Zealand Medical Association* 2012; **125**(1366).
11. Davis P, Suaalii-Sauni T, Lay-Yee R, Pearson J. Pacific Patterns in Primary Health Care: A comparison of Pacific and all patient visits to doctors: The National Primary Medical Care Survey (NatMedCa): 2001/02. Wellington: Ministry of Health, 2005.
12. Britt H, Britt H, Miller G, et al. General Practice Activity in Australia 2011-12: BEACH, Bettering the Evaluation And Care of Health: Sydney University Press; 2012.
13. Telfar Barnard L, Baker M, Pierse N, Zhang J. The impact of respiratory disease in New Zealand: 2014 update. Wellington: *The Asthma Foundation* 2015.
14. Dowell A, Turner N. Child health indicators: from theoretical frameworks to practical reality? *Br J Gen Pract* 2014; **64**(629): 608-9.
15. Gill PJ, Goldacre MJ, Mant D, et al. Increase in emergency admissions to hospital for children aged under 15 in England, 1999–2010: national database analysis. *Arch Dis Child* 2013: archdischild-2012-302383.
16. Hobbs FR, Bankhead C, Mukhtar T, et al. Clinical workload in UK primary care: a retrospective analysis of 100 million consultations in England, 2007–14. *The Lancet* 2016.
17. MacRae J, Darlow B, McBain L, et al. Accessing primary care Big Data: the development of a software algorithm to explore the rich content of consultation records. *BMJ Open* 2015; **5**.
18. MacRae J, Love T, Baker MG, et al. Identifying influenza-like illness presentation from unstructured general practice clinical narrative using a text classifier rule-based expert system versus a clinical expert. *BMC medical informatics and decision making* 2015; **15**(1): 1.
19. Salmond C, Crampton P, King P, Waldegrave C. NZiDep: a New Zealand index of socioeconomic deprivation for individuals. *Soc Sci Med* 2006; **62**(6): 1474-85.
20. Rogan WJ, Gladen B. Estimating prevalence from the results of a screening test. *Am J Epidemiol* 1978; **107**(1): 71-6.
21. Team RC. R: A language and environment for statistical computing. R Foundation for Statistical Computing, Vienna, Austria. 2013. ISBN 3-900051-07-0; 2014.

- 1  
2  
3 22. Chen Y, Williams E, Kirk M. Risk Factors for Acute Respiratory Infection in the Australian  
4 Community. 2014.
- 5 23. Taussig LM, Wright AL, Holberg CJ, Halonen M, Morgan WJ, Martinez FD. Tucson children's  
6 respiratory study: 1980 to present. *Journal of Allergy and Clinical Immunology* 2003; **111**(4): 661-75.
- 7 24. Mahadevan M, Navarro-Locsin G, Tan H, et al. A review of the burden of disease due to otitis  
8 media in the Asia-Pacific. *Int J Pediatr Otorhinolaryngol* 2012; **76**(5): 623-35.
- 9 25. Craig E, Adams JA, Oben G, Reddington A, Wicken A, Simpson JA. The health status of  
10 children and young people in the Hutt Valley and Capital and Coast DHBs. Dunedin, New Zealand: NZ  
11 Child and Youth Epidemiology Service, 2014.
- 12 26. Saxena S, Majeed A, Jones M. Socioeconomic differences in childhood consultation rates in  
13 general practice in England and Wales: prospective cohort study. *BMJ* 1999; **318**(7184): 642-6.
- 14 27. Golenko XA, Shibl R, Scuffham PA, Cameron CM. Relationship between socioeconomic status  
15 and general practitioner visits for children in the first 12 months of life: an Australian study.  
16 *Australian Health Review* 2015; **39**(2): 136-45.
- 17 28. Wu ST, Sohn S, Ravikumar KE, et al. Automated chart review for asthma cohort identification  
18 using natural language processing: an exploratory study. *Ann Allergy Asthma Immunol* 2013; **111**(5):  
19 364-9.
- 20 29. McColm D, Karcz A. Comparing manual and automated coding of physicians quality reporting  
21 initiative measures in an ambulatory EHR. *J Med Pract Manag* 2010; **26**(1): 6-12.
- 22 30. Gorelick MH, Knight S, Alessandrini EA, et al. Lack of agreement in pediatric emergency  
23 department discharge diagnoses from clinical and administrative data sources. *Acad Emerg Med*  
24 2007; **14**(7): 646-52.
- 25 31. Peabody JW, Luck J, Jain S, Bertenthal D, Glassman P. Assessing the accuracy of  
26 administrative data in health information systems. *Med Care* 2004; **42**(11): 1066-72.
- 27 32. O'Malley KJ, Cook KF, Price MD, Wildes KR, Hurdle JF, Ashton CM. Measuring diagnoses: ICD  
28 code accuracy. *Health Serv Res* 2005; **40**(5p2): 1620-39.
- 29 33. Brand PL, Baraldi E, Bisgaard H, et al. Definition, assessment and treatment of wheezing  
30 disorders in preschool children: an evidence-based approach. *Eur Respir J* 2008; **32**(4): 1096-110.
- 31  
32  
33  
34  
35  
36  
37  
38  
39  
40  
41  
42  
43  
44  
45  
46  
47  
48  
49  
50  
51  
52  
53  
54  
55  
56  
57  
58  
59  
60

**What this paper adds****What is already known on this subject**

- Previous national and international surveys describe a high estimated annual incidence of respiratory illness but very few data exist to describe the burden of respiratory illness in the community.
- More accurate assessment of illness presentation and service utilisation could be obtained by analysing consultation notes within electronic medical records (EMR) but there are difficulties extracting and analysing the structured and unstructured (free text) data available.
- The lack of primary care data significantly compromises effective planning of primary care services and integration of primary and secondary care activity.

**What this study adds**

- The development of a natural language processing algorithm enabled the exploration of both structured and unstructured consultation notes.
- 46 per cent of all child-GP consultations are due to presentation of respiratory illness with a remarkably stable year on year pattern of seasonal peaks, quantifying the very high volume of childhood respiratory consultations and workload in general practice, especially during the first two years of life.
- The use of 'big data' methods can help clinicians and planners to refine policy and management in this area, and the method has application to other areas of clinical practice.

# BMJ Open

## Childhood respiratory illness presentation and service utilisation in primary care: a six year cohort study in Wellington, New Zealand using Natural Language Processing (NLP) software.

|                                 |                                                                                                                                                                                                                                                                                                                                                                                                                                        |
|---------------------------------|----------------------------------------------------------------------------------------------------------------------------------------------------------------------------------------------------------------------------------------------------------------------------------------------------------------------------------------------------------------------------------------------------------------------------------------|
| Journal:                        | <i>BMJ Open</i>                                                                                                                                                                                                                                                                                                                                                                                                                        |
| Manuscript ID                   | bmjopen-2017-017146.R1                                                                                                                                                                                                                                                                                                                                                                                                                 |
| Article Type:                   | Research                                                                                                                                                                                                                                                                                                                                                                                                                               |
| Date Submitted by the Author:   | 23-Jun-2017                                                                                                                                                                                                                                                                                                                                                                                                                            |
| Complete List of Authors:       | Dowell, Anthony; University of Otago - Wellington , Primary Health Care and General Practice<br>Darlow, Ben; University of Otago, Primary Health Care and General Practice<br>MacRae, Jayden; Datacraft Analytics<br>Stubbe, Maria; University of Otago, Primary Health Care and General Practice<br>Turner, Nikki; University of Auckland, General Practice and Primary Health Care<br>McBain, Lynn; University of Otago, Wellington, |
| <b>Primary Subject Heading</b>: | General practice / Family practice                                                                                                                                                                                                                                                                                                                                                                                                     |
| Secondary Subject Heading:      | Health informatics, Paediatrics, Respiratory medicine                                                                                                                                                                                                                                                                                                                                                                                  |
| Keywords:                       | PRIMARY CARE, General Practice, Child health, Big Data, Respiratory illness                                                                                                                                                                                                                                                                                                                                                            |
|                                 |                                                                                                                                                                                                                                                                                                                                                                                                                                        |

SCHOLARONE™  
Manuscripts



# Childhood respiratory illness presentation and service utilisation in primary care: a six year cohort study in Wellington, New Zealand using Natural Language Processing (NLP) software.

Anthony Dowell. MBChB. – corresponding author.  
Department of Primary Health Care and General Practice.  
University of Otago – Wellington.  
23 Mein St, Newtown, Wellington 6242. New Zealand.  
[Tony.dowell@otago.ac.nz](mailto:Tony.dowell@otago.ac.nz)  
+64 21 270 1617.

Ben Darlow. PhD  
Department of Primary Health Care and General Practice.  
University of Otago – Wellington. 23 Mein St, Newtown, Wellington 6242. New Zealand.

Jayden Macrae. MSc  
Patients First, Level 4, 50 Customhouse Quay, Wellington 6011, New Zealand.

Maria Stubbe. PhD.  
Department of Primary Health Care and General Practice.  
University of Otago – Wellington. 23 Mein St, Newtown, Wellington 6242. New Zealand.

Nikki Turner. MD.  
Department of General Practice and Primary Health Care. University of Auckland. Level 8, Petherick Towers. 38 Waring Taylor St. Wellington CBD. New Zealand.

Lynn McBain. MD.  
Department of Primary Health Care and General Practice.  
University of Otago – Wellington. 23 Mein St, Newtown, Wellington 6242. New Zealand.

Word count 3158

## Key words

Primary Care, General Practice, Childhood respiratory illness, Natural language software programming, Big data.

## Abstract

### Objectives.

To identify childhood respiratory tract related illness presentation rates and service utilisation in primary care, by interrogating free text and coded data from Electronic Medical Records.

### Design.

Retrospective cohort study. Data interrogation used a natural language processing software inference algorithm.

**Setting.** 36 primary care practices in New Zealand. Data analysed from January 2008 – December 2013.

### Participants

The records from 77,582 children enrolled in were reviewed over a six-year period to estimate the presentation of childhood respiratory illness and service utilisation. This cohort represents 268,919 person years of data and over 650,000 unique consultations.

**Main outcome measure.** Childhood respiratory illness presentation rate to Primary Care practice, with description of seasonal and yearly variation.

### Results.

Respiratory conditions constituted 46 per cent of all child-general practitioner consultations with a stable year on year pattern of seasonal peaks. Upper Respiratory Tract Infection was the most common respiratory category accounting for 21.0% of all childhood consultations, followed by otitis media (12.2%), wheeze-related illness (9.7%), throat infection (7.4 %), and Lower Respiratory Tract Infection (4.4 %). Almost 70 per cent of children presented to their general practitioner with at least one respiratory condition in their first year of life; this reduced to approximately 25 per cent for children aged 10 to 17.

### Conclusion.

This is the first study to assess the primary care incidence and service utilisation of childhood respiratory illness in a large primary care cohort by interrogating Electronic Medical Record free text. The study identified the very high primary care workload related to childhood respiratory illness, especially during the first two years of life. These data can enable more effective planning of health service delivery. The findings and methodology have relevance to many countries, and the use of primary care 'big data' in this way can be applied to other health conditions.

**Strengths and limitations of this study**

- This study uses a novel and validated natural language processing software inference algorithm to identify childhood respiratory illness presentation rates and service utilisation using primary care Big Data.
- The presentation and burden of childhood respiratory diseases in primary care has not previously been estimated with such a high degree of accuracy.
- The algorithm was designed to maximise specificity, thereby generating a conservative estimate of the burden of childhood respiratory disease in primary care by keeping false positives to a minimum
- The methodology has relevance to many OECD countries, and the use of primary care natural language processing in this way can be applied to other health conditions.
- This study analysed normal hours primary care GP consultations. The exclusion of nurse-only and out-of-hours consultations may result in an underestimation of primary care respiratory presentation rates.

## Introduction

Childhood is a crucial period for development and well-being. A healthy start to life reduces adulthood morbidity and enhances participation in society.<sup>1-5</sup> Physical illness is an important risk factor for poor health outcomes.<sup>6</sup> Globally, primary care is utilised by all children,<sup>7</sup> but there is currently little published data of detailed morbidity and utilisation patterns in community settings.

Respiratory illness contributes substantially to childhood morbidity yet despite the plethora of studies of general respiratory epidemiology few data exist describing the burden of respiratory tract related illness in routine primary care. Children under five present up to six times a year with acute respiratory infections<sup>8</sup> and high prevalence rates are noted for asthma<sup>9</sup> and otitis media.<sup>10</sup> Such data are, however, mainly reliant on survey responses and parental report. These reports also lack precision regarding individual respiratory conditions, symptom severity, longitudinal patterns and variance related to age and seasonality. These data are needed to effectively plan primary health care service delivery. More detailed hospitalisation data are available<sup>11</sup>; however, these represent an unknown proportion of all cases and are based on diagnostic coding of uncertain accuracy.

International data suggest that respiratory tract related conditions constitute 20 to 25% of all general practitioner (GP) consultations, with higher rates in those under 25 years.<sup>12,13</sup> These data are based on GP self-report, and accuracy may be limited by the competing demands of reporting, meeting patient needs and practice management tasks. Wide variance has been reported in how GPs describe the reason for encounter.<sup>13</sup>

Improved understanding of primary care childhood respiratory illness presentation could enable more systematic approaches to care and resource allocation, and a context for exploring important social and ethnic variations in hospitalisation rates.<sup>11,14</sup> In the Organization for Economic Co-operation and Development (OECD) countries, conditions such as bronchiolitis, asthma, upper respiratory tract infections, and pneumonia make up over 40 % of Ambulatory Sensitive Hospitalisation (ASH); admissions considered preventable through interventions delivered outside of hospitals, predominantly within primary care.<sup>6,11,15,16</sup>

More accurate assessment of illness presentation and service utilisation could be obtained by analysing consultation notes within electronic medical records (EMR) common in OECD primary care settings. While there has been some exploration of the potential for 'big data' assessment of general practice workload,<sup>17</sup> these data have not previously been used to analyse childhood respiratory service utilisation due to difficulties with extracting and analysing both structured and unstructured data available (primarily clinical consultation notes). The development of novel software has enabled the exploration of New Zealand EMR data.<sup>18,19</sup>

This study aimed to interrogate data from EMR to identify primary care presentation and service utilisation related to common childhood respiratory tract conditions and their complications.

## Methods

### Design

A natural language processing software inference algorithm was developed to interrogate quantitative and qualitative cross-sectional and retrospective cohort data from EMR.<sup>18,19</sup>

### Setting and participants

Figure 1 illustrates the creation and analysis of the dataset. In New Zealand there is universal enrolment with a primary care practice. As more fully described in an earlier publication outlining the development of the design<sup>17</sup>, the study was conducted in the Wellington region of New Zealand, a mixed urban and rural setting. It consisted of 36 consenting practices of 60 in total from two primary health organisations (PHOs). This comprised 75% of the total childhood population under 18 years of age of these combined PHOs. There was a total of 77 467 children enrolled in these practices over the study period between 1 January 2008 until 31 December 2013, including children that both joined and left this cohort during this period. Changes included births, deaths, turning 18 years, or moving into or out of a practice. This cohort represented 268,919 person years.

Data were collected directly from EMR using software which automates the extraction, and secure transmission of large data sets. The dataset comprised records from consultations generated during both standard office hours and out-of-hours practice. Data were extracted from the EMR for all child-GP consultations at consenting practices during the study period (n= 687,136). Each consultation record was connected to an individual's National Health Index (NHI) number. This is a unique identifier assigned to every person who uses health services in New Zealand and enabled records to be matched between datasets. Consultations for which there were poor quality data (2439 consults from 256 children) were excluded. Out-of-hours consultations (n=34,584) were not analysed due to differing participation in out-of-hours services by the practices. All data were analysed within the PHO which has rigorous protocols in place to ensure patient confidentiality. The research team had not access to identifiable data.

### Process

Each of the 650,123 clinical consultation notes was interrogated by a software inference algorithm and hierarchical classification system described previously.<sup>19</sup> The algorithm classified consultation records using: clinical information recorded by GPs and practice nurses, any recorded Read code diagnostic classifications, and prescribing information. The first level of the hierarchy divided all consultations into either 'respiratory' or 'not respiratory'. Note that 'respiratory' here included all respiratory tract-related conditions and presentations and the associated complication of otitis media. The 'not respiratory' category included consultations where the primary presentation and diagnosis was for conditions such as injury or gastroenteritis, and consultations in which the respiratory system was examined and screened, but no signs, symptoms, or diagnoses were recorded. These screening consultations were excluded so that the burden of respiratory tract illness estimate was not inflated by consultations which did not result from a respiratory tract illness or its complications

The second level of the hierarchy sub-classified consultations into one or more specific respiratory categories. These categories were determined by a group of clinical experts; consideration was given to the degree to which conditions could be mapped to high prevalence (that which is common)

1  
2  
3 and/or responsible for significant morbidity and hospitalisation (that which is important). The six  
4 categories were i) upper respiratory tract infections (URTI); ii) lower respiratory tract infections  
5 (LRTI); iii) wheeze-related illnesses; iv) throat infections; v) otitis media; and vi) other respiratory  
6 conditions. The conditions included within each diagnostic category are presented in Appendix 1.  
7

8  
9 The algorithm was trained, tested, and validated using three independent gold standard data sets of  
10 1200 consultation records which had been independently classified by two general practice clinical  
11 experts (AD and LM). The algorithm was designed to replicate the judgements made by these clinical  
12 experts. Development aimed to optimise specificity while maximising sensitivity to minimise the  
13 occurrence of false positives. The algorithm's sensitivity, specificity, positive and negative predictive  
14 values, and F-measure for each of the diagnostic categories against a gold standard validation set of  
15 1200 consultation records has been published previously.<sup>18</sup>  
16

## 17 18 **Analysis**

19 The demographic characteristics of age, gender, ethnicity (NZ indigenous Māori, Pacific, other), and  
20 New Zealand Deprivation Index (a measure of socioeconomic deprivation<sup>20</sup>) of the cohort (n=77,326)  
21 were compared with those of all children enrolled within the two PHOs (N=103,333) and the  
22 New Zealand population using national census data.  
23  
24

25 The proportion of primary care consultations for children aged 18 years and under which were  
26 related to the six specific respiratory conditions outlined above was obtained from the dataset using  
27 the algorithm. The utilisation of services for these six conditions was analysed by demographic  
28 characteristics. Consultation rates are expressed per 1000 child years observed due to the differing  
29 length of time individuals might be participants in the cohort. Patients were observed for the period  
30 in which they were enrolled in a participating practice; this was calculated from the date of a child's  
31 first visit to a practice until they were removed from the enrolment register. Both deprivation and  
32 ethnicity status were taken as the last ethnicity and deprivation recorded from the GP records.  
33 Consultation rates were adjusted for sensitivity and specificity of the algorithm<sup>18</sup> and a direct  
34 standardization method was applied to level 2 ethnicity and socio-economic deprivation  
35 quintiles against NZ Census 2013 data. Estimates of true rates were made using final test sensitivity  
36 and specificity results for each classification category using the method described by Rogan and  
37 Gladen.<sup>21</sup> All Data aggregation, transformation, cleaning and storage was done in Microsoft SQL  
38 Server, and statistical analysis was undertaken in R using packages including boot,  
39 epiR, combinat, stats, tm, RWeka, slam, SnowballC and caret.<sup>22</sup>  
40 STROBE Guidelines were followed.  
41  
42  
43  
44

## 45 **Results**

46 The demographic characteristics of the study cohort closely matched those of the enrolled  
47 population (Appendix 2). The age distribution of the study cohort also closely matched the national  
48 comparison data. Compared with national census data the study cohort had a greater proportion of  
49 children from the least deprived quintile grouping (32% vs 25%) and a lower proportion of Māori  
50 (17% vs 22%).  
51  
52

53 From the 650,123 consultations reviewed the true rate of presentation for a respiratory tract  
54 condition or complication was calculated to be 45.4 per cent of all consultations for children under  
55 18 years of age (Figure 1). URTI was the most common respiratory tract related category  
56 represented in 21.0% (95% CI 20.9-21.2%) of all consultations, followed by otitis media (12.2% CI  
57  
58  
59  
60

1  
2  
3 12.1-12.3%), wheeze-related illness (9.7% CI 9.5-9.7%), throat infection (7.4 % CI 7.3-7.5%), and LRTI  
4 (4.4 % CI 4.4 – 4.5%). Other respiratory tract related classifications accounted for just 1.5% of all  
5 consultations . One respiratory tract related condition was classified in 27.6% of all consultations,  
6 two in 7.0%, three in 0.8%, and greater than three in 0.1%. The rates of child respiratory tract  
7 condition or complication consultation were 1,101 per 1,000 person years observed for all  
8 respiratory tract conditions and complications, 509 per 1000 for URTI, 107 per 1000 for LRTI, 235 per  
9 1000 for Wheeze Illness, 180 per 1000 for Throat Infections, 296 per 1000 for Otitis Media and 36  
10 per 1000 for Other Respiratory conditions. The incidence of both respiratory and non-respiratory  
11 tract related consultations remained stable throughout the study period with a consistent pattern of  
12 seasonal peaks and troughs (Fig 2). The respiratory tract related consultation rate was highest in the  
13 Southern Hemisphere winter month of August, and lowest in January (Figure 3). Non-respiratory  
14 consultations followed a similar pattern but with shallower peaks and troughs. Respiratory tract  
15 related conditions explained 64.4% of the annual seasonal variation in child consultation rates. All  
16 respiratory tract related conditions which were sub-classified followed a similar pattern of peaks in  
17 August and troughs in January except for 'other' respiratory tract conditions which were highest in  
18 December and lowest in April (Figure 4). Figures 4 and 5 present the annual variation in respiratory  
19 tract condition related presentation for each classification category.  
20  
21  
22  
23  
24

25 Respiratory tract related consultations occurred throughout childhood, but at much greater  
26 frequency during the first two years of life. (Figure 6) During the first year of life 73.5 % of children  
27 presented to their GP with at least one respiratory tract related condition. Following the second year  
28 of life, the presentation of all respiratory tract related conditions decreased with increasing age. Of  
29 children aged 10 to 17 years, 22.5 % presented with at least one respiratory condition (Figure 6). The  
30 mean number of presentations for respiratory tract infection for an individual was 2.6 per year in  
31 those under 2 years, 2.1 per year in those aged 3 to 5 years, and 1.5 per year in those over 15 years.  
32  
33  
34  
35  
36  
37  
38  
39  
40  
41  
42  
43  
44  
45  
46  
47  
48  
49  
50  
51  
52  
53  
54  
55  
56  
57  
58  
59  
60

1  
2  
3  
4  
5 Fig 2 : Respiratory tract related and non-respiratory consultations per quarter per 1000 enrolled  
6 children January 2008 to December 2013.  
7  
8  
9  
10  
11  
12  
13  
14  
15  
16  
17  
18  
19  
20  
21  
22  
23  
24  
25  
26  
27  
28  
29  
30  
31  
32  
33  
34

35 Figure 3: Mean respiratory tract related and non-respiratory consultations per month per 1000  
36 enrolled children. January 2008 to December 2013 demonstrating seasonal variation.  
37  
38  
39  
40  
41  
42  
43  
44  
45  
46  
47  
48  
49  
50  
51  
52  
53  
54  
55  
56  
57  
58  
59  
60



1  
2  
3  
4  
5  
6  
7  
8  
9  
10  
11  
12  
13  
14  
15  
16  
17  
18  
19  
20  
21  
22  
23  
24  
25  
26  
27  
28  
29  
30  
31  
32  
33  
34  
35  
36  
37  
38  
39  
40  
41  
42  
43  
44  
45  
46  
47  
48  
49  
50  
51  
52  
53  
54  
55  
56  
57  
58  
59  
60

Figure 4: Yearly variation of consultations per month per 1000 enrolled children for each respiratory tract related illness category - January 2008 to December 2013.

Figure 5 : Mean consultations per month per 1000 enrolled children for each respiratory tract related illness category - January 2008 to December 2013

For peer review only

1  
2  
3 Figure 6: Respiratory tract related consultation frequency by selected age cohort.  
4  
5  
6

7 Figure 6: Each facet includes children who were enrolled within that age band for a twelve month  
8 period (e.g. from the day they turned one until the day before they turned two). The cohort of  
9 children under one is small because many children do not enrol until they are over three months old  
10 and may therefore only be enrolled for nine months before turning one.  
11

## 12 Discussion

13 This is the first study to assess the primary care incidence and service utilisation of childhood  
14 respiratory tract related illness in such a large cohort observing over 250,000 person years and more  
15 than 650,000 unique consultations. Using a novel and validated method of interrogating EMR free  
16 text, this study found that respiratory tract related conditions constituted 45.4 per cent of all child-  
17 GP consultations. This quantifies the very high volume of childhood respiratory tract related  
18 consultations and workload in general practice, especially during the first two years of life. These  
19 data can enable more effective planning of primary care service delivery and indicate areas in which  
20 to focus preventive programmes. The study also highlights the high presentation rates to primary  
21 care of those respiratory conditions which frequently present for hospital admission.  
22  
23  
24  
25

## 26 Comparison with other studies

27 The presentation rate of respiratory illness and pattern of seasonal peaks was remarkably stable  
28 across the six years included in this data set and was unchanged by events such as the H1N1  
29 influenza pandemic of 2009. Consistent with findings from Australian<sup>8,23</sup> and Chilean surveys<sup>24</sup>, the  
30 presentation of nearly all respiratory consultations more than doubled during the winter months,  
31 and providing a comparator with 'seasonal' changes between wet and dry seasons seen in tropical  
32 regions.<sup>25</sup> Respiratory consultations classified as 'other' had a different pattern with a peak in  
33 spring, consistent with seasonal allergies being the primary contributor to this classification group.  
34 The high presentation rates of wheeze-related illness highlights the importance of these conditions  
35 in primary care management, and aligns with the high community burden of wheeze identified from  
36 other cohort studies.<sup>9,26</sup> The prevalence of otitis media is consistent with other studies.<sup>27</sup>  
37  
38  
39  
40

41 While we could find no other studies that used an NLP methodology, our findings are consistent with  
42 the stated underestimate of respiratory illness prevalence reported from a recent primary care study  
43 in Ireland using Read code data only.<sup>28</sup>  
44

45 Childhood respiratory conditions feature highly as a cause of hospital admissions thought to be  
46 amenable to preventive activity in primary care. These data suggests only small numbers of children  
47 are hospitalised compared to the high volume of respiratory conditions managed within general  
48 practice.<sup>11,29</sup> It is possible that paediatric hospitalisations thus represent appropriate care for  
49 children with severe respiratory illness, or significant socioeconomic difficulty rather than reflecting  
50 unmet need within primary care.  
51  
52

53 These data also provide information about consulting patterns across across the childhood life  
54 course, highlighting the frequency of consultation in the early years and in particular during the first  
55 two years of life. While high consultation frequency in the earlier years has been recognised  
56 previously, data have usually been grouped within a birth to five years age band,<sup>30</sup> or focused on a  
57  
58  
59  
60

1  
2  
3 single year of life.<sup>31</sup> This study highlights the degree of primary care contact children have in their  
4 first two years of life. Strategic management of clinical contact during this time may improve care  
5 delivery and enable a balance between preventive and acute care activity.  
6

### 7 8 **Strengths and limitations of study**

9 This study examined a very large data set of child-GP consultations including clinical consultation  
10 notes, diagnostic codes and prescribing information by way of a software inference algorithm which  
11 performed with similar accuracy to clinical experts.<sup>18</sup> The algorithm was designed to maximise  
12 specificity, thereby generating a conservative estimate of the burden of childhood respiratory  
13 disease in primary care by keeping false positives to a minimum. The presentation and burden of  
14 childhood respiratory diseases in primary care has not previously been estimated with such a high  
15 degree of accuracy.  
16

17  
18 Computer algorithms using natural language processing have previously been found to be  
19 considerably more accurate than relying on diagnostic codes to make respiratory diagnoses.<sup>32</sup>  
20

21  
22 Data representing 75 per cent of the child population enrolled within two large primary health  
23 organisations, were analysed. The study data set included over 650,000 consultation records  
24 (representing over 260,000 person years of data) and the age, ethnic, and socioeconomic  
25 characteristics of children enrolled within participating practices were almost identical to those of  
26 children enrolled in practices which declined, and to the broader New Zealand population.  
27

28  
29 This study analysed normal hours primary care GP consultations. The exclusion of nurse-only and  
30 out-of-hours consultations may result in an underestimation of primary care respiratory tract related  
31 presentation rates. Nurse-only consultations were excluded because only a small proportion of  
32 nursing records relate to direct clinical consultations and it was not possible for the algorithm to  
33 distinguish these from non-clinical records such as telephone calls.<sup>18</sup> The data set excluded out-of-  
34 hours consultations because out-of-hours care is also provided elsewhere to children from  
35 consenting practices, consequently PHO out-of-hours data were incomplete.  
36

37  
38 Although validation of the software algorithm against the gold standard of two expert clinicians'  
39 opinion indicated that it had excellent accuracy, particularly with respect to classification of  
40 consultations as respiratory tract related or non-respiratory, this methodology can only provide an  
41 estimation of the presentation of these respiratory conditions and resultant service utilisation. It  
42 would be impractical to manually check the several hundred thousand consultation records included  
43 in the full data set. Notwithstanding this, it is debateable whether manual record review would  
44 generate a more accurate estimation.<sup>33,34</sup>  
45

46  
47 The gold standard used for this study was the GP's stated diagnosis, matched to GP experts'  
48 assessment based on clinical data available. There is the potential for error in the GP decision-  
49 making,<sup>35,36</sup> and is limited by the amount and detail of the recorded information by each GP. While  
50 recognising this limitation accuracy of GP diagnosis was not the prime purpose of this study, the  
51 intention was to estimate illness and health service utilisation as identified by the GP records.  
52

53  
54 The algorithm requires common conditions with sufficient prevalence to allow effective training.  
55 Therefore some important but less prevalent conditions (e.g. croup, pertussis, and pneumonia)  
56 required to be grouped. As a result, the study cannot give estimations of the burden of some  
57  
58  
59  
60

1  
2  
3 diseases, which although relatively rare have considerable morbidity. The algorithm was not  
4 designed to differentiate between types of wheeze-related illness given the variation and debate  
5 among clinicians regarding the classification of wheeze presentations for younger children.<sup>37</sup>  
6

## 7 8 **Conclusions and policy implications**

9 These data have demonstrated a clear and consistent pattern in general practice utilisation for  
10 children with respiratory tract related illness. Results of this type can assist with general practice  
11 workforce planning, and inform debate about current presentation and triage models seen in  
12 primary care. The study also highlighted the burden of respiratory disease carried by the youngest  
13 members of society and reinforces calls to focus prevention and health promotion campaigns on  
14 early stages of the maternal and child health continuum.  
15

16  
17 The methodology used can be applied to provide similar estimates of respiratory and other  
18 conditions and workload across an entire population at all ages. The use of NLP software in this way  
19 also provides a tool for health service planning in primary care which would have increasing  
20 application across a wide range of countries.  
21  
22  
23  
24  
25  
26

## 27 **Footnotes**

## 28 29 30 **Acknowledgements**

31 The authors gratefully acknowledge the primary care practices which consented to their  
32 consultation records being included in the study dataset, and the primary health organisations which  
33 permitted use of proprietary software and resources.  
34  
35  
36

## 37 38 **Author contributions**

39 AD, JM, MS, LM, and NT conceived of the study. All authors contributed to the development of the  
40 overall study methodology. AD, LM and NT provided clinical input into the algorithm design. JM  
41 designed and built the natural language processing tools. JM programmed and trained the  
42 algorithm. AD and LM classified the consultation records in the gold standard sets. BD and AD were  
43 the principal writers of the manuscript. All authors reviewed and revised the manuscript and  
44 approved its final version.  
45  
46

47 All authors had full access to all of the data (including statistical reports and tables) in the study and  
48 can take responsibility for the integrity of the data and the accuracy of the data analysis.  
49  
50

## 51 52 **Competing interests**

53 All authors have completed the Unified Competing Interest form at  
54 [www.icmje.org/coi\\_disclosure.pdf](http://www.icmje.org/coi_disclosure.pdf) (available on request from the corresponding author) and declare  
55 support from New Zealand Lotteries Health Research for the submitted work. LM is a director of  
56  
57  
58  
59  
60

1  
2  
3 Compass Health Wellington Trust that might have an interest in the submitted work, no other  
4 relationships or activities could appear to have influenced the submitted work  
5  
6

## 7 8 **Licence**

9 The Corresponding Author has the right to grant on behalf of all authors and does grant on behalf of  
10 all authors, a worldwide licence  
11 (<http://www.bmj.com/sites/default/files/BMJ%20Author%20Licence%20March%202013.doc>) to the  
12 Publishers and its licensees in perpetuity, in all forms, formats and media (whether known now or  
13 created in the future)  
14  
15

## 16 17 **Funding statement**

18 This work was supported by a New Zealand Lotteries Health Research Grant. The funding body had  
19 no role in the collection or analysis of data or the preparation of this manuscript.  
20  
21

## 22 23 **Provenance and peer review**

24 Not commissioned; externally peer reviewed.  
25  
26

## 27 28 **Data sharing statement**

29 No additional data are available.  
30  
31

## 32 33 **Open Access**

34 This is an Open Access article distributed in accordance with the Creative Commons Attribution Non  
35 Commercial (CC BY-NC 4.0) license, which permits others to distribute, remix, adapt, build upon this  
36 work non-commercially, and license their derivative works on different terms, provided the original  
37 work is properly cited and the use is non-commercial. See: <http://creativecommons.org/licenses/by-nc/4.0/>  
38  
39  
40  
41

## 42 43 **Ethical approval**

44 This study was approved by the University of Otago Ethics Committee (H13/044)  
45  
46  
47  
48  
49  
50  
51  
52  
53  
54  
55  
56  
57  
58  
59  
60

1  
2  
3  
4 Figure 1. Selection of child-GP consultation notes and results from analysis.

5 More than one respiratory condition can be classified in each consultation.

6  
7 GP = general practitioner; URTI = upper respiratory tract infection; LRTI = lower respiratory tract  
8 infection; Wheeze-ill = wheeze-related illness  
9  
10  
11  
12  
13  
14  
15  
16  
17  
18  
19  
20  
21  
22  
23  
24  
25  
26  
27  
28  
29  
30  
31  
32  
33  
34  
35  
36  
37  
38  
39  
40  
41  
42  
43  
44  
45  
46  
47  
48  
49  
50  
51  
52  
53  
54  
55  
56  
57  
58  
59  
60

For peer review only

1  
2  
3  
4  
5  
6  
7  
8  
9  
10  
11  
12  
13  
14  
15  
16  
17  
18  
19  
20  
21  
22  
23  
24  
25  
26  
27  
28  
29  
30  
31  
32  
33  
34  
35  
36  
37  
38  
39  
40  
41  
42  
43  
44  
45  
46  
47  
48  
49  
50  
51  
52  
53  
54  
55  
56  
57  
58  
59  
60

Appendix 1

For peer review only

Appendix 2

For peer review only

1  
2  
3  
4  
5  
6  
7  
8  
9  
10  
11  
12  
13  
14  
15  
16  
17  
18  
19  
20  
21  
22  
23  
24  
25  
26  
27  
28  
29  
30  
31  
32  
33  
34  
35  
36  
37  
38  
39  
40  
41  
42  
43  
44  
45  
46  
47  
48  
49  
50  
51  
52  
53  
54  
55  
56  
57  
58  
59  
60



## References

1. Hertzman C, Siddiqi A, Hertzman E, et al. Tackling inequality: get them while they're young. *BMJ* 2010; **340**(7742): 346-8.
2. Lynch JW, Kaplan GA, Cohen RD, et al. Childhood and adult socioeconomic status as predictors of mortality in Finland. *The Lancet* 1994; **343**(8896): 524-7.
3. Marmot MG, Allen JL, Goldblatt P, et al. Fair society, healthy lives: Strategic review of health inequalities in England post-2010. 2010.
4. Walker SP, Wachs TD, Grantham-McGregor S, et al. Inequality in early childhood: risk and protective factors for early child development. *The Lancet* 2011; **378**(9799): 1325-38.
5. Bethell CD, Newacheck P, Hawes E, Halfon N. Adverse childhood experiences: assessing the impact on health and school engagement and the mitigating role of resilience. *Health Affairs* 2014; **33**(12): 2106-15.
6. The Green Paper for Vulnerable Children. Every child thrives, belongs, achieves. Wellington, NZ.: New Zealand Government, 2011.
7. Ministry of Health. New Zealand Health Survey: Annual update of key findings 2012/13. Wellington, NZ: Ministry of Health, 2013.
8. Chen Y, Kirk M. Incidence of acute respiratory infections in Australia. *Epidemiology and infection* 2014; **142**(07): 1355-61.
9. Asher MI, Montefort S, Björkstén B, et al. Worldwide time trends in the prevalence of symptoms of asthma, allergic rhinoconjunctivitis, and eczema in childhood: ISAAC Phases One and Three repeat multicountry cross-sectional surveys. *The Lancet* 2006; **368**(9537): 733-43.
10. Gribben B, Salkeld LJ, Hoare S, Jones HF. The incidence of acute otitis media in New Zealand children under five years of age in the primary care setting. *J Prim Health Care* 2012; **4**(3): 205-12.
11. Craig E, Anderson P, Jackson G, Jackson C. Measuring potentially avoidable and ambulatory care sensitive hospitalisations in New Zealand children using a newly developed tool. *Journal of the New Zealand Medical Association* 2012; **125**(1366).
12. Davis P, Suaalii-Sauni T, Lay-Yee R, Pearson J. Pacific Patterns in Primary Health Care: A comparison of Pacific and all patient visits to doctors: The National Primary Medical Care Survey (NatMedCa): 2001/02. Wellington: Ministry of Health, 2005.
13. Britt H, Britt H, Miller G, et al. General Practice Activity in Australia 2011-12: BEACH, Bettering the Evaluation And Care of Health: Sydney University Press; 2012.
14. Telfar Barnard L, Baker M, Pierse N, Zhang J. The impact of respiratory disease in New Zealand: 2014 update. Wellington: *The Asthma Foundation* 2015.
15. Dowell A, Turner N. Child health indicators: from theoretical frameworks to practical reality? *Br J Gen Pract* 2014; **64**(629): 608-9.
16. Gill PJ, Goldacre MJ, Mant D, et al. Increase in emergency admissions to hospital for children aged under 15 in England, 1999–2010: national database analysis. *Arch Dis Child* 2013; archdischild-2012-302383.
17. Hobbs FR, Bankhead C, Mukhtar T, et al. Clinical workload in UK primary care: a retrospective analysis of 100 million consultations in England, 2007–14. *The Lancet* 2016.
18. MacRae J, Darlow B, McBain L, et al. Accessing primary care Big Data: the development of a software algorithm to explore the rich content of consultation records. *BMJ Open* 2015; **5**.
19. MacRae J, Love T, Baker MG, et al. Identifying influenza-like illness presentation from unstructured general practice clinical narrative using a text classifier rule-based expert system versus a clinical expert. *BMC medical informatics and decision making* 2015; **15**(1): 1.
20. Salmond C, Crampton P, King P, Waldegrave C. NZiDep: a New Zealand index of socioeconomic deprivation for individuals. *Soc Sci Med* 2006; **62**(6): 1474-85.
21. Rogan WJ, Gladen B. Estimating prevalence from the results of a screening test. *Am J Epidemiol* 1978; **107**(1): 71-6.

22. Team RC. R: A language and environment for statistical computing. R Foundation for Statistical Computing, Vienna, Austria. 2013. ISBN 3-900051-07-0; 2014.
23. Chen Y, Williams E, Kirk M. Risk Factors for Acute Respiratory Infection in the Australian Community. 2014.
24. Astudillo P, Mancilla P, Olmos C, Reyes Á. Epidemiology of pediatric respiratory consultations in Santiago de Chile, from 1993 to 2009. *Revista Panamericana de Salud Pública* 2012; **32**(1): 56-61.
25. Rosa AM, Ignotti E, Botelho C, Castro HAd, Hacon SdS. Respiratory disease and climatic seasonality in children under 15 years old in a town in the Brazilian Amazon. *J Pediatr (Rio J)* 2008; **84**(6): 543-9.
26. Taussig LM, Wright AL, Holberg CJ, Halonen M, Morgan WJ, Martinez FD. Tucson children's respiratory study: 1980 to present. *Journal of Allergy and Clinical Immunology* 2003; **111**(4): 661-75.
27. Mahadevan M, Navarro-Lochin G, Tan H, et al. A review of the burden of disease due to otitis media in the Asia-Pacific. *Int J Pediatr Otorhinolaryngol* 2012; **76**(5): 623-35.
28. Molony D, Beame C, Behan W, et al. 70,489 primary care encounters: retrospective analysis of morbidity at a primary care centre in Ireland. *Irish Journal of Medical Science (1971-)* 2016; **185**(4): 805-11.
29. Craig E, Adams JA, Oben G, Reddington A, Wicken A, Simpson JA. The health status of children and young people in the Hutt Valley and Capital and Coast DHBs. Dunedin, New Zealand: NZ Child and Youth Epidemiology Service, 2014.
30. Saxena S, Majeed A, Jones M. Socioeconomic differences in childhood consultation rates in general practice in England and Wales: prospective cohort study. *BMJ* 1999; **318**(7184): 642-6.
31. Golenko XA, Shibl R, Scuffham PA, Cameron CM. Relationship between socioeconomic status and general practitioner visits for children in the first 12 months of life: an Australian study. *Australian Health Review* 2015; **39**(2): 136-45.
32. Wu ST, Sohn S, Ravikumar KE, et al. Automated chart review for asthma cohort identification using natural language processing: an exploratory study. *Ann Allergy Asthma Immunol* 2013; **111**(5): 364-9.
33. McColm D, Karcz A. Comparing manual and automated coding of physicians quality reporting initiative measures in an ambulatory EHR. *J Med Pract Manag* 2010; **26**(1): 6-12.
34. Gorelick MH, Knight S, Alessandrini EA, et al. Lack of agreement in pediatric emergency department discharge diagnoses from clinical and administrative data sources. *Acad Emerg Med* 2007; **14**(7): 646-52.
35. Peabody JW, Luck J, Jain S, Bertenthal D, Glassman P. Assessing the accuracy of administrative data in health information systems. *Med Care* 2004; **42**(11): 1066-72.
36. O'Malley KJ, Cook KF, Price MD, Wildes KR, Hurdle JF, Ashton CM. Measuring diagnoses: ICD code accuracy. *Health Serv Res* 2005; **40**(5p2): 1620-39.
37. Brand PL, Baraldi E, Bisgaard H, et al. Definition, assessment and treatment of wheezing disorders in preschool children: an evidence-based approach. *Eur Respir J* 2008; **32**(4): 1096-110.

**What this paper adds****What is already known on this subject**

- Previous national and international surveys describe a high estimated annual incidence of respiratory illness but very few data exist to describe the burden of respiratory illness in the community.
- More accurate assessment of illness presentation and service utilisation could be obtained by analysing consultation notes within electronic medical records (EMR) but there are difficulties extracting and analysing the structured and unstructured (free text) data available.
- The lack of primary care data significantly compromises effective planning of primary care services and integration of primary and secondary care activity.

**What this study adds**

- The development of a natural language processing algorithm enabled the exploration of both structured and unstructured consultation notes.
- 46 per cent of all child-GP consultations are due to presentation of respiratory illness with a remarkably stable year on year pattern of seasonal peaks, quantifying the very high volume of childhood respiratory consultations and workload in general practice, especially during the first two years of life.
- The use of 'big data' methods can help clinicians and planners to refine policy and management in this area, and the method has application to other areas of clinical practice.

1  
2  
3  
4  
5  
6  
7  
8  
9  
10  
11  
12  
13  
14  
15  
16  
17  
18  
19  
20  
21  
22  
23  
24  
25  
26  
27  
28  
29  
30  
31  
32  
33  
34  
35  
36  
37  
38  
39  
40  
41  
42  
43  
44  
45  
46  
47  
48  
49  
50  
51  
52  
53  
54  
55  
56  
57  
58  
59  
60

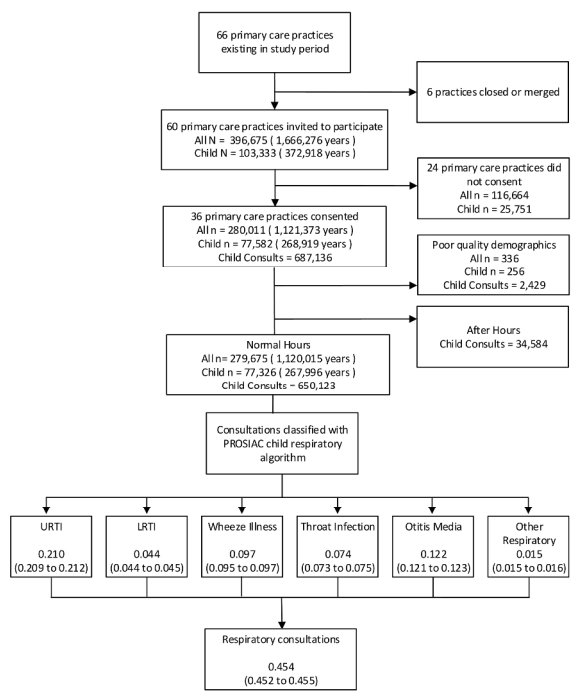

Figure 1. Selection of child-GP consultation notes and results from analysis.

297x420mm (300 x 300 DPI)

1  
2  
3  
4  
5  
6  
7  
8  
9  
10  
11  
12  
13  
14  
15  
16  
17  
18  
19  
20  
21  
22  
23  
24  
25  
26  
27  
28  
29  
30  
31  
32  
33  
34  
35  
36  
37  
38  
39  
40  
41  
42  
43  
44  
45  
46  
47  
48  
49  
50  
51  
52  
53  
54  
55  
56  
57  
58  
59  
60

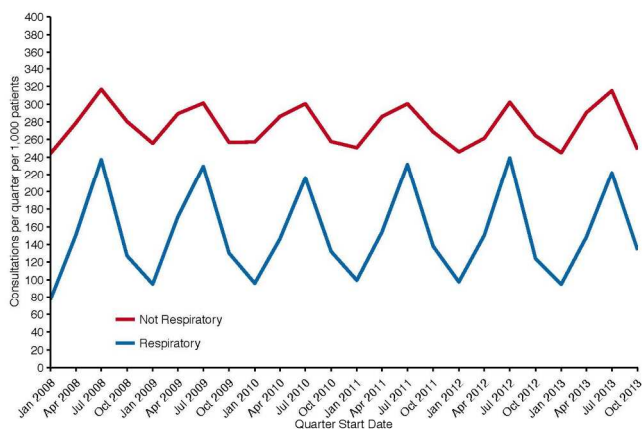

Fig 2 : Respiratory tract related and non-respiratory consultations per quarter per 1000 enrolled children January 2008 to December 2013.

297x420mm (300 x 300 DPI)

1  
2  
3  
4  
5  
6  
7  
8  
9  
10  
11  
12  
13  
14  
15  
16  
17  
18  
19  
20  
21  
22  
23  
24  
25  
26  
27  
28  
29  
30  
31  
32  
33  
34  
35  
36  
37  
38  
39  
40  
41  
42  
43  
44  
45  
46  
47  
48  
49  
50  
51  
52  
53  
54  
55  
56  
57  
58  
59  
60

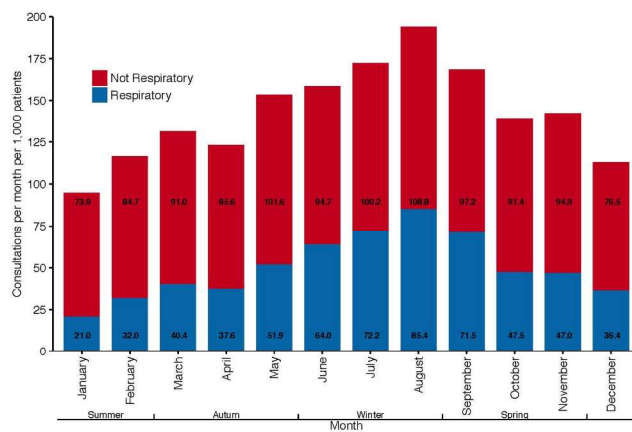

Figure 3: Mean respiratory tract related and non-respiratory consultations per month per 1000 enrolled children. January 2008 to December 2013 demonstrating seasonal variation.

297x420mm (300 x 300 DPI)

1  
2  
3  
4  
5  
6  
7  
8  
9  
10  
11  
12  
13  
14  
15  
16  
17  
18  
19  
20  
21  
22  
23  
24  
25  
26  
27  
28  
29  
30  
31  
32  
33  
34  
35  
36  
37  
38  
39  
40  
41  
42  
43  
44  
45  
46  
47  
48  
49  
50  
51  
52  
53  
54  
55  
56  
57  
58  
59  
60

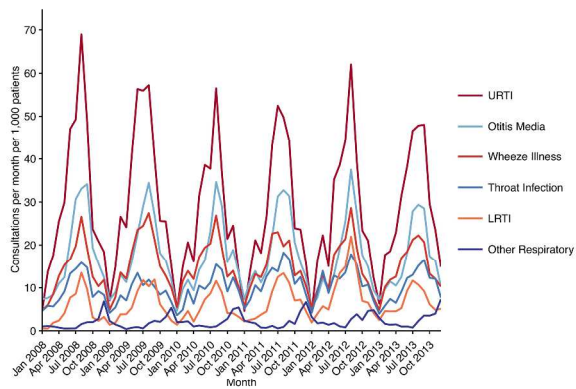

Figure 4: Yearly variation of consultations per month per 1000 enrolled children for each respiratory tract related illness category - January 2008 to December 2013.

297x420mm (300 x 300 DPI)

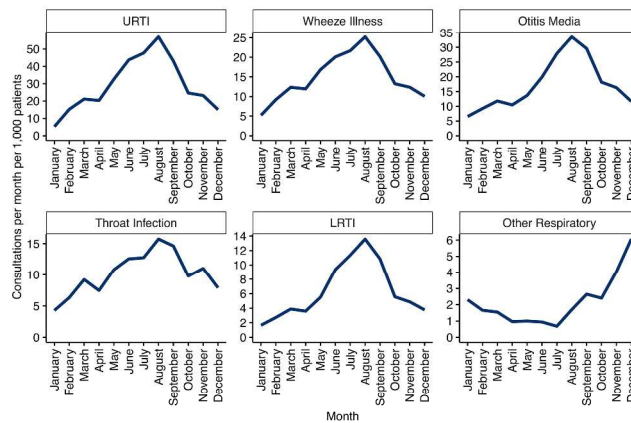

Figure 5 : Mean consultations per month per 1000 enrolled children for each respiratory tract related illness category - January 2008 to December 2013

297x420mm (300 x 300 DPI)



1  
2  
3  
4  
5  
6  
7  
8  
9  
10  
11  
12  
13  
14  
15  
16  
17  
18  
19  
20  
21  
22  
23  
24  
25  
26  
27  
28  
29  
30  
31  
32  
33  
34  
35  
36  
37  
38  
39  
40  
41  
42  
43  
44  
45  
46  
47  
48  
49  
50  
51  
52  
53  
54  
55  
56  
57  
58  
59  
60

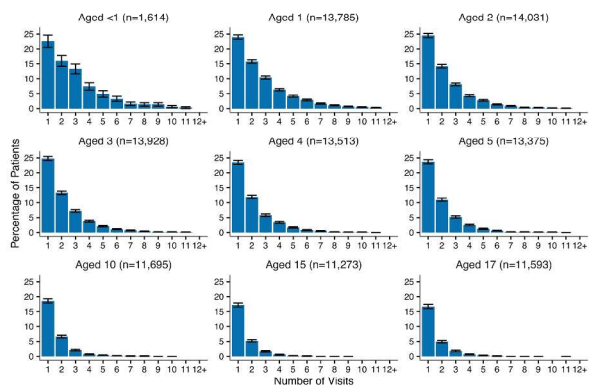

Figure 6: Respiratory tract related consultation frequency by selected age cohort.

297x420mm (300 x 300 DPI)

## Appendix 1

Respiratory classification categories and the conditions included in each

| Classification category            | Respiratory conditions included within category*                                                                                                                                                                                                                                                                                                                                                                                                                                                                                                                                                    |
|------------------------------------|-----------------------------------------------------------------------------------------------------------------------------------------------------------------------------------------------------------------------------------------------------------------------------------------------------------------------------------------------------------------------------------------------------------------------------------------------------------------------------------------------------------------------------------------------------------------------------------------------------|
| Upper respiratory tract infections | <ul style="list-style-type: none"> <li>• Cold</li> <li>• Croup</li> <li>• Influenza-like illness</li> <li>• Viral influenza in the absence of associated signs or symptoms indicative of lower respiratory tract infection</li> <li>• Scarlet fever</li> <li>• Tracheitis</li> <li>• Cough in the absence of associated signs or symptoms indicative of asthma or lower respiratory tract infection</li> </ul>                                                                                                                                                                                      |
| Lower respiratory tract infections | <ul style="list-style-type: none"> <li>• Bronchitis</li> <li>• Bronchopneumonia</li> <li>• Chest infection</li> <li>• Chronic lung disease</li> <li>• Cystic fibrosis</li> <li>• Lung abscess/bronchiectasis</li> <li>• Pertussis</li> <li>• Pleurisy</li> <li>• Pneumonia</li> <li>• Tuberculosis</li> <li>• Whooping cough</li> </ul>                                                                                                                                                                                                                                                             |
| Wheeze-related illness             | <ul style="list-style-type: none"> <li>• Bronchiolitis</li> <li>• Virus-induced transient wheeze</li> <li>• Persistent wheeze (nonatopic or atopic)</li> <li>• Asthma</li> </ul>                                                                                                                                                                                                                                                                                                                                                                                                                    |
| Throat infections                  | <ul style="list-style-type: none"> <li>• Infectious mononucleosis</li> <li>• Laryngitis</li> <li>• Pharyngitis</li> <li>• Pharyngotonsillitis</li> <li>• Tonsillitis</li> </ul>                                                                                                                                                                                                                                                                                                                                                                                                                     |
| Otitis media                       | <ul style="list-style-type: none"> <li>• Acute otitis media</li> <li>• Chronic suppurative otitis media</li> <li>• Otitis media with effusion</li> <li>• Glue ear</li> </ul>                                                                                                                                                                                                                                                                                                                                                                                                                        |
| Other respiratory                  | <ul style="list-style-type: none"> <li>• Conditions with very low prevalence ) for which there are not individual categories <ul style="list-style-type: none"> <li>○ Allergic rhinitis</li> <li>○ Hay fever</li> <li>○ Rhinitis</li> <li>○ Sinusitis</li> </ul> </li> <li>• Consultations in which respiratory symptoms are present but there is insufficient GP entered data to enable classification</li> <li>• Consultations in which respiratory symptoms are present with sufficient GP entered data to enable classification but the algorithm fails to classify the consultation</li> </ul> |

\*These classifications are based purely on the information within the electronic health record including consultation notes, medications prescribed and diagnostic Read Codes created on the day of the consultation. It does not include subsequent laboratory tests

Appendix 2: Demographic characteristics of children in the study cohort at the end of the study compared with enrolled population and national census data.

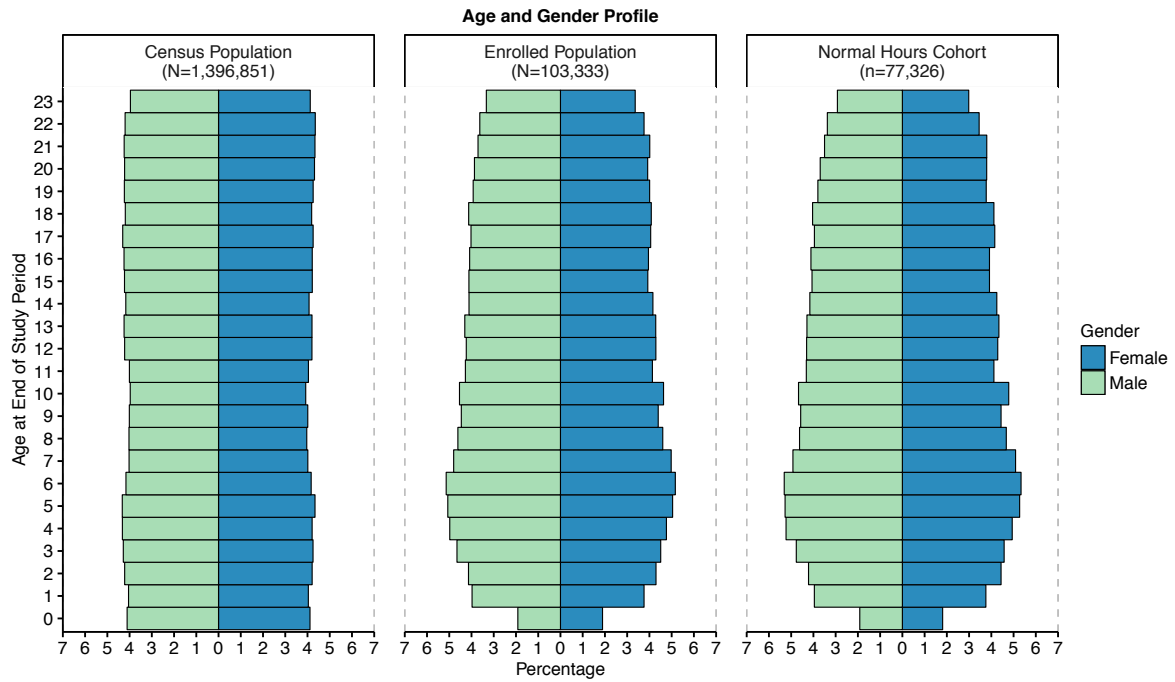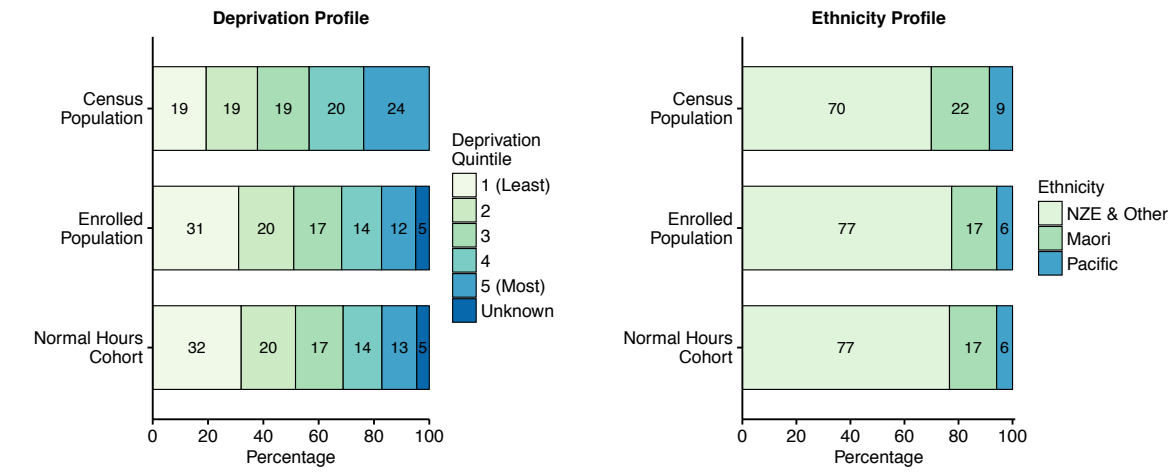

Note that the age range extends to 22 because people who were 17 at the start of the study period were 23 at the end of the study. Data stopped being collected from these participants when they turn 18.

The cohort appears to have a low proportion of children under one year of age because the cohort demographic data represents the last day of the study, so many children who entered the cohort under one year of age had moved into a higher age band.

Deprivation quintile is unknown for 0.05 per cent of the census population. This is not shown on the graph.

**Childhood respiratory illness presentation and service utilisation in primary care: a six year cohort study in Wellington, New Zealand using Natural Language Processing (NLP) software.**

**Strobe Checklist of items that should be included in reports of cohort studies**

|                      | Item | Recommendation                                                                                                                                                                                                    | Completed                                         |
|----------------------|------|-------------------------------------------------------------------------------------------------------------------------------------------------------------------------------------------------------------------|---------------------------------------------------|
| Title and abstract   | 1    | (a) Indicate the study's design with a commonly used term in the title or the abstract<br>(b) Provide in the abstract an informative and balanced summary of what was done and what was found                     | Yes – Page 1<br><br>Yes – Page 1<br>Lines 34 - 52 |
| <b>Introduction</b>  |      |                                                                                                                                                                                                                   |                                                   |
| Background/rationale | 2    | Explain the scientific background and rationale for the investigation being reported                                                                                                                              | Yes, - Page 4<br>Lines 10-46                      |
| Objectives           | 3    | State specific objectives, including any prespecified hypotheses                                                                                                                                                  | Yes, Page 4<br>Lines 50-51                        |
| <b>Methods</b>       |      |                                                                                                                                                                                                                   |                                                   |
| Study design         | 4    | Present key elements of study design early in the paper                                                                                                                                                           | Yes Page 5<br>Lines 6 – 7                         |
| Setting              | 5    | Describe the setting, locations, and relevant dates, including periods of recruitment, exposure, follow-up, and data collection                                                                                   | Yes – Page 5<br>Lines 10-22                       |
| Participants         | 6    | (a) Give the eligibility criteria, and the sources and methods of selection of participants. Describe methods of follow-up<br>(b) For matched studies, give matching criteria and number of exposed and unexposed | Yes Page 5<br>Lines 16-22<br><br>N/A              |
| Variables            | 7    | Clearly define all outcomes, exposures, predictors, potential confounders, and effect                                                                                                                             | Yes – Page 5<br>Line 40 to P                      |

|                         |    |                                                                                                                                                                                                                                                                                                                                    |                                                                                                                             |
|-------------------------|----|------------------------------------------------------------------------------------------------------------------------------------------------------------------------------------------------------------------------------------------------------------------------------------------------------------------------------------|-----------------------------------------------------------------------------------------------------------------------------|
|                         |    | modifiers. Give diagnostic criteria, if applicable                                                                                                                                                                                                                                                                                 | 6 Line 16                                                                                                                   |
| Datasources/measurement | 8  | For each variable of interest, give sources of data and details of methods of assessment (measurement).<br><br>Describe comparability of assessment methods if there is more than one group                                                                                                                                        | Yes PAGE 6<br>Line 25-42<br><br>N/A                                                                                         |
| Bias                    | 9  | Describe any efforts to address potential sources of bias                                                                                                                                                                                                                                                                          | Yes Page 5<br>Line 40-54                                                                                                    |
| Study size              | 10 | Explain how the study size was arrived a                                                                                                                                                                                                                                                                                           | Yes Page 5<br>Line 16-22                                                                                                    |
| Quantitative variables  | 11 | Explain how quantitative variables were handled in the analyses. If applicable, describe which groupings were chosen and why                                                                                                                                                                                                       | Yes<br>Page 6<br>Line 26 - 39                                                                                               |
| Statistical methods     | 12 | 9a) Describe all statistical methods, including those used to control for confounding<br><br>(b) Describe any methods used to examine subgroups and interactions<br><br>(c) Explain how missing data were addressed<br>(d) If applicable, explain how loss to follow-up was addressed<br><br>(e) Describe any sensitivity analysis | Yes Page 6<br>Line 26 -39<br><br>Yes Page 5<br>Line 40-60<br><br>Yes, Fig 1<br><br>Yes, refer to original methodology paper |
| <b>Results</b>          |    |                                                                                                                                                                                                                                                                                                                                    |                                                                                                                             |
| Participants            | 13 | (a) Report numbers of individuals at each stage of study—eg numbers potentially eligible, examined for eligibility, confirmed eligible, included in the study, completing follow-up, and analysed<br><br>(b) Give reasons for non-participation at each stage<br><br>(c) Consider use of a flow diagram                            | Yes – Fig 1<br>P15<br><br>Yes – Fig 1<br><br>Yes – Fig 1                                                                    |
| Descriptive data        | 14 | (a) Give characteristics of study participants (eg demographic, clinical, social) and information on exposures and potential                                                                                                                                                                                                       | Yes – Fig 1                                                                                                                 |

|                          |    |                                                                                                                                                                                                                                                                                                                                                                                                                              |                                                              |
|--------------------------|----|------------------------------------------------------------------------------------------------------------------------------------------------------------------------------------------------------------------------------------------------------------------------------------------------------------------------------------------------------------------------------------------------------------------------------|--------------------------------------------------------------|
|                          |    | <p>confounders</p> <p>(b) Indicate number of participants with missing data for each variable of interest</p> <p>(c) Summarise follow-up time (eg, average and total amount)</p>                                                                                                                                                                                                                                             | <p>Yes</p> <p>Yes Page 1</p> <p>Line 10-12</p>               |
| Outcome data             | 15 | Report numbers of outcome events or summary measures over time                                                                                                                                                                                                                                                                                                                                                               | <p>Yes Page 6</p> <p>Line 53 – P7</p>                        |
| Main results             | 16 | <p>(a) Give unadjusted estimates and, if applicable, confounder-adjusted estimates and their precision (eg, 95% confidence interval). Make clear which confounders were adjusted for and why they were included</p> <p>(b) Report category boundaries when continuous variables were categorized</p> <p>(c) If relevant, consider translating estimates of relative risk into absolute risk for a meaningful time period</p> | <p>Yes Page 6/7</p> <p>Line 57 - 4</p> <p>N/A</p> <p>N/A</p> |
| Other analyses           | 17 | Report other analyses done—eg analyses of subgroups and interactions, and sensitivity analyses                                                                                                                                                                                                                                                                                                                               | <p>YES Page 7</p> <p>Line 14-33</p>                          |
| <b>Discussion</b>        |    |                                                                                                                                                                                                                                                                                                                                                                                                                              |                                                              |
| Key results              | 18 | Summarise key results with reference to study objectives                                                                                                                                                                                                                                                                                                                                                                     | YES Page 10                                                  |
| Limitations              | 19 | Discuss limitations of the study, taking into account sources of potential bias or imprecision. Discuss both direction and magnitude of any potential bias                                                                                                                                                                                                                                                                   | <p>YES Page 11</p> <p>Line 52</p>                            |
| Interpretation           | 20 | Give a cautious overall interpretation of results considering objectives, limitations, multiplicity of analyses, results from similar studies, and other relevant evidence                                                                                                                                                                                                                                                   | YES Page 11/12                                               |
| Generalisability         | 21 | Discuss the generalisability (external validity) of the study results                                                                                                                                                                                                                                                                                                                                                        | <p>YES Page 12</p> <p>Line 33-45</p>                         |
| <b>Other information</b> |    |                                                                                                                                                                                                                                                                                                                                                                                                                              |                                                              |

1  
2  
3  
4  
5  
6  
7  
8  
9  
10  
11  
12  
13  
14  
15  
16  
17  
18  
19  
20  
21  
22  
23  
24  
25  
26  
27  
28  
29  
30  
31  
32  
33  
34  
35  
36  
37  
38  
39  
40  
41  
42  
43  
44  
45  
46  
47  
48  
49  
50  
51  
52  
53  
54  
55  
56  
57  
58  
59  
60

|         |    |                                                                                                                                                               |                           |
|---------|----|---------------------------------------------------------------------------------------------------------------------------------------------------------------|---------------------------|
| Funding | 22 | Give the source of funding and the role of the funders for the present study and, if applicable, for the original study on which the present article is based | YES Page 13<br>Line 52/53 |
|---------|----|---------------------------------------------------------------------------------------------------------------------------------------------------------------|---------------------------|

For peer review only
