# Supplementary material for: Childhood respiratory illness presentation and service utilisation in primary care: a six-year cohort study in Wellington, New Zealand, using natural language processing (NLP) software
Source: PubMed Central journal article supplement — BMJ Open. 2017 Aug 1;7(7):e017146. doi: 10.1136/bmjopen-2017-017146 (PMC5642764; doi:10.1136/bmjopen-2017-017146), 2017-08-01
Supplement: bmjopen-2017-017146supp001.pdf [file bmjopen-2017-017146supp001.pdf]

Appendix 2: Demographic characteristics of children in the study cohort at the end of the study compared with enrolled population and national census data.

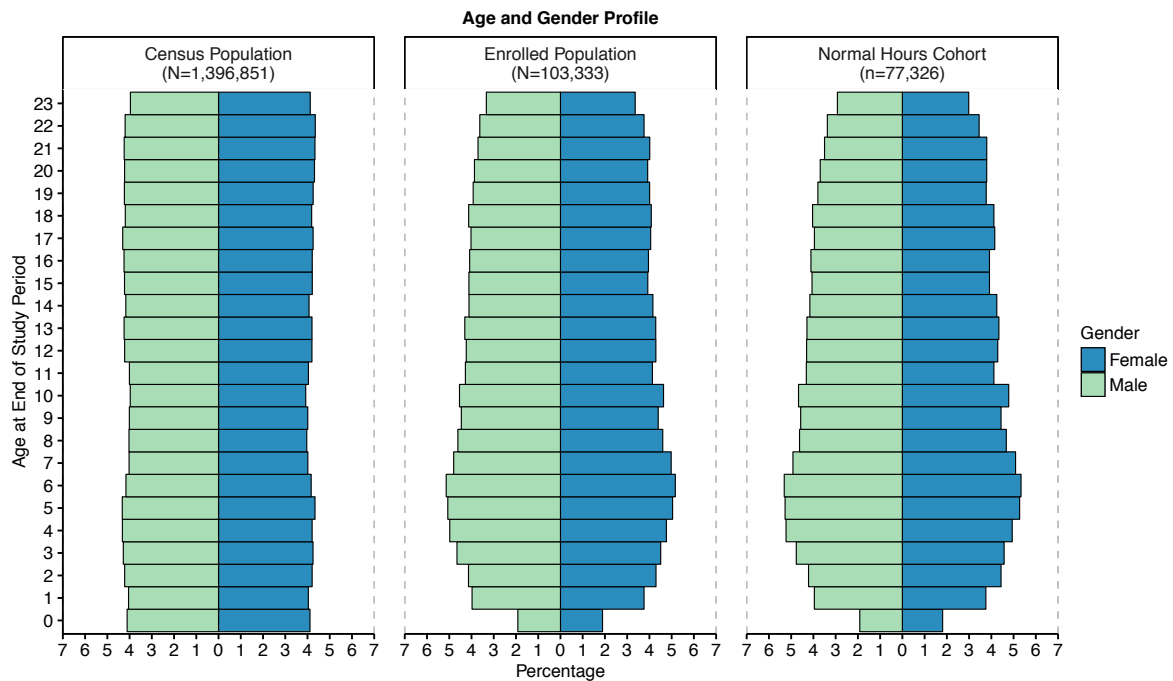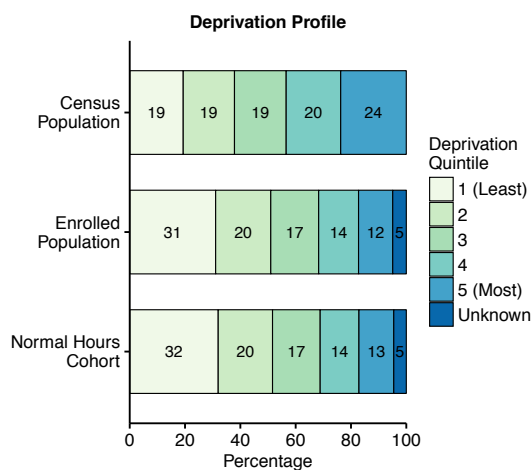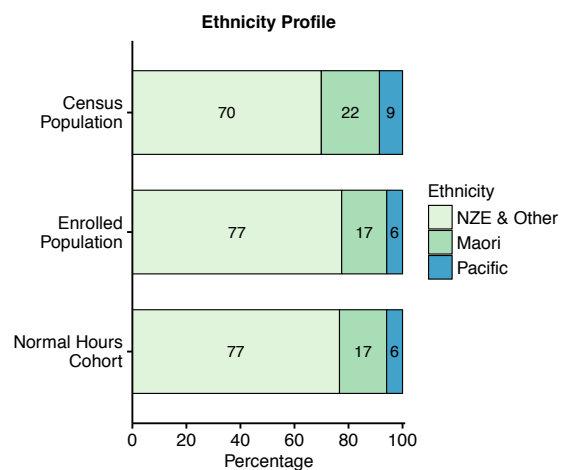

Note that the age range extends to 22 because people who were 17 at the start of the study period were 23 at the end of the study. Data stopped being collected from these participants when they turn 18.

The cohort appears to have a low proportion of children under one year of age because the cohort demographic data represents the last day of the study, so many children who entered the cohort under one year of age had moved into a higher age band.

Deprivation quintile is unknown for 0.05 per cent of the census population. This is not shown on the graph.
