# Supplementary material for: Childhood respiratory illness presentation and service utilisation in primary care: a six-year cohort study in Wellington, New Zealand, using natural language processing (NLP) software
Source: PubMed Central journal article supplement — BMJ Open. 2017 Aug 1;7(7):e017146. doi: 10.1136/bmjopen-2017-017146 (PMC5642764; doi:10.1136/bmjopen-2017-017146), 2017-08-01
Supplement: bmjopen-2017-017146supp002.pdf [file bmjopen-2017-017146supp002.pdf]

## Appendix 1

Respiratory classification categories and the conditions included in each

| Classification category            | Respiratory conditions included within category*                                                                                                                                                                                                                                                                                                                                                                                                                                                                                                                                                    |
|------------------------------------|-----------------------------------------------------------------------------------------------------------------------------------------------------------------------------------------------------------------------------------------------------------------------------------------------------------------------------------------------------------------------------------------------------------------------------------------------------------------------------------------------------------------------------------------------------------------------------------------------------|
| Upper respiratory tract infections | <ul style="list-style-type: none"> <li>• Cold</li> <li>• Croup</li> <li>• Influenza-like illness</li> <li>• Viral influenza in the absence of associated signs or symptoms indicative of lower respiratory tract infection</li> <li>• Scarlet fever</li> <li>• Tracheitis</li> <li>• Cough in the absence of associated signs or symptoms indicative of asthma or lower respiratory tract infection</li> </ul>                                                                                                                                                                                      |
| Lower respiratory tract infections | <ul style="list-style-type: none"> <li>• Bronchitis</li> <li>• Bronchopneumonia</li> <li>• Chest infection</li> <li>• Chronic lung disease</li> <li>• Cystic fibrosis</li> <li>• Lung abscess/bronchiectasis</li> <li>• Pertussis</li> <li>• Pleurisy</li> <li>• Pneumonia</li> <li>• Tuberculosis</li> <li>• Whooping cough</li> </ul>                                                                                                                                                                                                                                                             |
| Wheeze-related illness             | <ul style="list-style-type: none"> <li>• Bronchiolitis</li> <li>• Virus-induced transient wheeze</li> <li>• Persistent wheeze (nonatopic or atopic)</li> <li>• Asthma</li> </ul>                                                                                                                                                                                                                                                                                                                                                                                                                    |
| Throat infections                  | <ul style="list-style-type: none"> <li>• Infectious mononucleosis</li> <li>• Laryngitis</li> <li>• Pharyngitis</li> <li>• Pharyngotonsillitis</li> <li>• Tonsillitis</li> </ul>                                                                                                                                                                                                                                                                                                                                                                                                                     |
| Otitis media                       | <ul style="list-style-type: none"> <li>• Acute otitis media</li> <li>• Chronic suppurative otitis media</li> <li>• Otitis media with effusion</li> <li>• Glue ear</li> </ul>                                                                                                                                                                                                                                                                                                                                                                                                                        |
| Other respiratory                  | <ul style="list-style-type: none"> <li>• Conditions with very low prevalence ) for which there are not individual categories <ul style="list-style-type: none"> <li>○ Allergic rhinitis</li> <li>○ Hay fever</li> <li>○ Rhinitis</li> <li>○ Sinusitis</li> </ul> </li> <li>• Consultations in which respiratory symptoms are present but there is insufficient GP entered data to enable classification</li> <li>• Consultations in which respiratory symptoms are present with sufficient GP entered data to enable classification but the algorithm fails to classify the consultation</li> </ul> |

\*These classifications are based purely on the information within the electronic health record including consultation notes, medications prescribed and diagnostic Read Codes created on the day of the consultation. It does not include subsequent laboratory tests
